1     **Stable eusociality via maternal manipulation when**  
2                                     **resistance is costless**

3                                     **Mauricio González-Forero**

4                                     **Sunday 26<sup>th</sup> July, 2015**

5     Department of Ecology and Evolutionary Biology, University of Tennessee, Knoxville, TN,

6     USA

7     National Institute for Mathematical and Biological Synthesis (NIMBioS)

8     Department of Ecology and Evolution, University of Lausanne, Switzerland

9  
10    Keywords: Parent-offspring conflict, altruism, maternal effects, pheromone.

11    Running title: Stable eusociality via maternal manipulation.

12  
13    Mauricio.GonzalezForero@unil.ch

14    UNIL Sorge

15    Biophore

16    CH - 1015 Lausanne

17    Switzerland

18    Phone: +41 21 692 4267

19    Fax: +41 21 692 4165

20

## Abstract

21

In many eusocial species, queens use pheromones to influence offspring to express worker phenotypes. While evidence suggests that queen pheromones are honest signals of the queen's reproductive health, here I show that queen's honest signaling can result from ancestral maternal manipulation. I develop a mathematical model to study the coevolution of maternal manipulation, offspring resistance to manipulation, and maternal resource allocation. I assume that (1) maternal manipulation causes offspring to be workers against offspring's interests; (2) offspring can resist at no direct cost, as is thought to be the case with pheromonal manipulation; and (3) the mother chooses how much resource to allocate to fertility and maternal care. In the coevolution of these traits, I find that maternal care decreases, thereby increasing the benefit that offspring obtain from help, which in the long run eliminates selection for resistance. Consequently, ancestral maternal manipulation yields stable eusociality despite costless resistance. Additionally, ancestral manipulation in the long run becomes honest signaling that induces offspring to help. These results indicate that both eusociality and its commonly associated queen honest signaling can be likely to originate from ancestral manipulation.

22

23

24

25

26

27

28

29

30

31

32

33

34

35

36

## 37 **Introduction**

38 Eusocial organisms form colonies that are distinctly influenced by their queens. In many  
39 species, a eusocial colony is composed of one queen and largely non-reproductive workers  
40 that are the queen's offspring (Wilson, 1971, Michener, 1974). Whether a queen's offspring  
41 becomes a worker or a future queen is often mediated by the queen herself: for example,  
42 (1) the queen in some social wasps and bees maintains the reproductive monopoly of the  
43 colony through aggression (Fletcher and Ross, 1985); (2) in many social insects the queen  
44 can feed offspring with food of different quantity or quality influencing offspring's future  
45 reproductive caste (i.e., queen or worker) (e.g., O'Donnell, 1998, Bourke and Ratnieks, 1999,  
46 Kapheim *et al.*, 2011, Brand and Chapuisat, 2012); (3) in an ant species the queen can  
47 deposit hormones in the eggs inducing offspring to develop into workers (Schwander *et al.*,  
48 2008); (4) in certain wasp and termite species the queen can produce pheromones that  
49 prevent offspring from becoming queens (Bhadra *et al.*, 2010, Matsuura *et al.*, 2010); and  
50 (5) in honeybees queen pheromones can induce workers to feed larvae without royal jelly  
51 causing larvae to develop into workers (Le Conte and Hefetz, 2008, Kamakura, 2011). In  
52 addition to influencing caste determination, queens can use pheromones to keep workers'  
53 ovaries undeveloped (e.g., Holman *et al.*, 2010, Van Oystaeyen *et al.*, 2014), and to alter  
54 workers' brain functioning inducing workers to perform various tasks (Beggs *et al.*, 2007).  
55 Although other factors can influence offspring's worker phenotype (e.g., environmental  
56 temperature, colony size, colony age, and offspring genetic predisposition; Lo *et al.*, 2009,  
57 Schwander *et al.*, 2010), queen influence on worker development, sterility, and behavior is  
58 widespread in eusocial taxa (Fletcher and Ross, 1985, Le Conte and Hefetz, 2008,  
59 Schwander *et al.*, 2010).

60 The function of queen influence is typically interpreted in terms of either manipulation

61 or honest signaling (Dawkins and Krebs, 1978, Keller and Nonacs, 1993). Manipulation  
62 refers to altering a recipient individual's phenotype against its inclusive fitness interests  
63 (Dawkins, 1978, 1982), as is increasingly well documented in host manipulation by  
64 parasites (Poulin, 2010, Maure *et al.*, 2011, 2013, Dheilly *et al.*, 2015). In contrast, signaling  
65 refers to altering a recipient's phenotype in its inclusive fitness interests, provided that the  
66 signaler evolved to produce that effect and the recipient to attend the signal (Maynard  
67 Smith and Harper, 2003). Manipulation and honest signaling thus differ in that the former  
68 implies conflict while the latter does not.

69 The presence or absence of conflict entails contrasting evolutionary patterns. On the  
70 one hand, manipulation by the queen implies that the population can be in one of three  
71 possible stages: in an ongoing arms race between manipulation and resistance to it, in  
72 successful manipulation if resistance is costly enough, or in successful resistance if  
73 resistance is sufficiently cost-free (e.g., Trivers, 1974, Craig, 1979, Uller and Pen, 2011,  
74 González-Forero and Gavrillets, 2013). On the other hand, queen honest signaling implies  
75 mutually beneficial coevolution of queen influence and offspring response (Keller and  
76 Nonacs, 1993, Maynard Smith and Harper, 2003). Then, a key factor allowing to distinguish  
77 manipulation from honest signaling is the cost of resistance: if resistance is rather costless  
78 and no arms race is detected, queen influence is expected to more likely be honest  
79 signaling (Keller and Nonacs, 1993). In particular, queen influence via pheromones is  
80 thought to be rather costless to resist and is thus considered more likely to be honest  
81 signaling than manipulation (Keller and Nonacs, 1993) as is increasingly supported by the  
82 evidence (e.g., Heinze and d'Ettorre, 2009, van Zweden *et al.*, 2014).

83 Then, while the commonality of queen influence has long suggested that eusociality can  
84 be caused by maternal manipulation (Alexander, 1974, Michener and Brothers, 1974,

85 Linksvayer and Wade, 2005, Russell and Lummaa, 2009), this has not been supported by the  
86 evidence of queen honest signaling. Here I describe a mechanism that offers an  
87 explanation for the lack of evidence of manipulation. In this mechanism, maternal  
88 manipulation yields eusociality while becoming honest signaling in the long run.

89 Manipulation is of particular interest because it allows eusociality to evolve under  
90 relatively lax conditions when resistance cannot evolve (e.g., Trivers, 1974, Charlesworth,  
91 1978). Without maternal manipulation, the genes for helping behavior are in the offspring  
92 who then control their own behavior. Under standard assumptions, helping is then favored  
93 when the fitness cost to the helper ( $c$ ) is smaller than the fitness benefit to the recipient ( $b$ )  
94 weighted by their relatedness ( $r$ ; i.e.,  $br > c$ , Hamilton, 1964, Frank, 1998). In contrast, with  
95 maternal manipulation and disregarding resistance, the genes for helping are by definition  
96 in the mother, who then controls offspring helping behavior. Helping is in this case favored  
97 under smaller benefit-cost ratios (e.g.,  $b/c > 1$  rather than  $b/c > 1/r$ ), because the costs of  
98 helping are paid by the helper rather than by the individual controlling the behavior (e.g.,  
99 Trivers, 1974, Charlesworth, 1978). Now, if resistance can occur but is costly enough to be  
100 disfavored, manipulation is still particularly likely to generate eusociality because of the  
101 smaller benefit-cost ratios required (González-Forero and Gavrilets, 2013).

102 Yet, if manipulation can be resisted at no cost, the evolution of offspring resistance is  
103 expected to destabilize eusociality (Trivers, 1974, Craig, 1979, Keller and Nonacs, 1993,  
104 Uller and Pen, 2011). This view is suggested by a variety of relevant mathematical models of  
105 evolutionary conflict (Ratnieks, 1988, Ratnieks and Reeve, 1992, Reeve and Keller, 2001,  
106 Wenseleers *et al.*, 2003, 2004b,a, Cant, 2006, Ratnieks *et al.*, 2006, Shen and Reeve, 2010,  
107 Uller and Pen, 2011, Dobata, 2012, González-Forero and Gavrilets, 2013, González-Forero,  
108 2014). A possible way to stabilize eusociality via manipulation is suggested by a study

109 where the evolution of the benefit eliminates the mother-offspring conflict over helping  
110 behavior (González-Forero, 2014). Still, such disappearance of conflict requires that a form  
111 of resistance is costly (i.e., helping inefficiency). Since resistance to queen pheromones is  
112 presumably costless, it is of particular interest to determine if eusociality can be stabilized  
113 even when there are no direct costs associated with resistance.

114 With this aim, I develop a model for the coevolution of maternal manipulation,  
115 offspring costless resistance, and maternal resource allocation into fertility and maternal  
116 care. I show that the coevolution of these traits yields a reduction of maternal care that  
117 increases the benefit that offspring receive from help. This eliminates the mother-offspring  
118 conflict over helping behavior and stabilizes eusociality. These results rely on the  
119 assumption that offspring receiving no maternal care use help more efficiently than  
120 offspring receiving maternal care. In contrast to previous findings, this form of conflict  
121 resolution can occur without any direct costs of resistance.

## 122 **Model**

### 123 **Key assumptions**

124 I consider a population with parental care. For concreteness, I take parental care to be  
125 brood provisioning, although it can be any form of parental care directed to individual  
126 offspring rather than to an entire brood (e.g., some forms of brood defense; Cocroft, 2002).  
127 Each mother produces and provisions two subsequent broods, and then dies. The first  
128 brood reaches adulthood while the second one is not yet mature, so generations are  
129 overlapping. This form of reproduction is common in primitively eusocial paper wasps and  
130 sweat bees as well as in their solitary sister taxa (Michener, 1990, Hunt, 2007). Upon

131 reaching adulthood, all adults disperse from their natal nest to a common mating pool. All  
132 individuals in the mating pool mate once and randomly. This assumption of single mating  
133 follows the evidence that monogamy is ancestral to eusociality (Hughes *et al.*, 2008,  
134 Boomsma, 2009). After mating, females compete globally for patches with resources to  
135 establish their nests. Each successful female secures a patch with resources and allocates  
136 the secured resources into producing and provisioning offspring of the two broods, closing  
137 the life cycle.

138 I study the coevolution of five traits: one for maternal influence, one for offspring  
139 resistance, and three describing maternal resource allocation to fertility and care of the two  
140 broods. Maternal influence is a trait that allows the mother to influence first-brood  
141 offspring to stay in the natal nest as adults (e.g., by disrupting the physiological process  
142 that urges offspring to leave, say by means of a pheromone). Maternal influence is thus a  
143 maternal effect trait (Wolf and Wade, 2009). Influenced offspring can acquiesce (i.e., not  
144 resist) by staying as adults in their natal nest and by expressing some of their usual parental  
145 care behaviors. A similar form of acquiescence is known in hosts that are manipulated by  
146 parasites to perform defense behaviors (Maure *et al.*, 2011, 2013). The parental care  
147 behaviors expressed by acquiescing first-brood offspring are received by the available  
148 brood which are second-brood offspring (i.e., helping is directed toward full siblings). I  
149 refer to an acquiescing individual as a helper. If a second-brood offspring receives help, its  
150 survival increases, where offspring survival is defined as the probability to become a parent.

151 Alternatively, the offspring resistance trait allows influenced offspring to resist the  
152 maternal influence by leaving the nest to mate without delay and without incurring any  
153 direct fitness loss (e.g., by reducing the number of binding site receptors of the pheromone;  
154 as discussed by Kuijper and Hoyle, 2015). Similar dispersal behaviors are known for

155 first-brood individuals leaving their natal nest in primitively eusocial paper wasps (Reeve  
156 *et al.*, 1998) and sweat bees (Yanega, 1988). I assume the effectiveness of resistance to  
157 maternal influence to be weak at the start of the coevolutionary process because  
158 individuals have not been previously exposed to such maternal influence. An analogous  
159 example of weak resistance has been experimentally documented in microorganisms when  
160 exposed to novel parasites (Lohse *et al.*, 2006).

161 Maternal resource allocation occurs as follows. One trait describes how much resource  
162 the mother devotes to each of the two broods, and the other two traits (one for each brood)  
163 describe how much of this resource she spends in producing and provisioning offspring.  
164 The three maternal resource allocation traits are controlled by the mother. An offspring is  
165 either provisioned or not by the mother, and I refer to the former as maternally provisioned  
166 and to the latter as maternally neglected. These two properties describe an offspring  
167 condition. After the mother has had the opportunity to provision offspring, both  
168 maternally provisioned and neglected offspring can be provisioned by helpers. I refer to  
169 offspring provisioned by helpers as helped offspring. Maternally neglected offspring die if  
170 not helped, but can regain some of their survival by being helped. Such recovery by being  
171 helped has been documented in cooperatively breeding birds (Russell *et al.*, 2007). At the  
172 start of the coevolutionary process, the mother is favored to provision all of her offspring.  
173 This assumption relies on parental care as an accepted precondition for eusociality  
174 (Andersson, 1984).

175 The interactions in the model are summarized in Fig. 1. Note that maternal influence  
176 does not occur through poor provisioning since maternal provisioning is either complete  
177 or absent, and thus maternally neglected offspring die if not helped (Fig. 1). Indeed, it will  
178 be seen that maternal influence is directed toward first-brood offspring while the mother



179 reduces maternal care toward second-brood offspring.

180 The central assumption of the model is the following: I assume that maternally

181 neglected offspring use help more efficiently than maternally provisioned offspring.

182 Consequently, for a unit of food received from helpers, the survival of maternally neglected

183 offspring increases more than that of maternally provisioned offspring. This assumption

184 relies on the expectation that maternally neglected offspring are under stronger pressure to

185 use this food in order to regain survival.

## 186 **Maternal influence and offspring resistance**

187 To capture all components of selection on the traits in the model, it is enough to monitor

188 four classes of individuals: (1) young mothers, who produce first-brood offspring; (2) old

189 mothers, who produce second-brood offspring; (3) first-brood subjects (or just subjects),

190 who are the subset of first-brood offspring that can be influenced by the mother (e.g.,

191 female offspring as for hymenopteran eusociality, or both female and male offspring as for

192 isopteran eusociality); and (4) second-brood offspring. These four classes are respectively

193 indexed by  $i = m, M, 1, 2$ .

194 A focal young mother influences a first-brood subject with probability  $p_m$  to delay

195 dispersal from its natal nest. Here I make use of a notation that I will use throughout: for

196 each trait, the first subscript indicates the class of the individual that controls the trait,

197 while the trait without a class subscript refers to the population average (Table 1). An

198 influenced subject resists with probability  $q_1$  and leaves its natal nest without delay.

199 Alternatively, an influenced subject acquiesces with probability  $1 - q_1$  and stays in its natal

200 nest for some portion of its adulthood. An acquiescing subject expresses parental care (i.e.,

201 provisioning) while in its natal nest with some probability (the evolution of this probability

202 is studied elsewhere; González-Forero, 2014). As stated above, this parental care is directed  
203 toward the available brood which are second-brood offspring.

204 The survival of a second-brood, maternally provisioned offspring increases by an  
205 amount  $b_p$  for each helper that helps it individually, while that of a maternally neglected  
206 one increases by an amount  $b_n$ . Such  $b_p$  and  $b_n$  specify the benefit from being helped. By  
207 the assumption that maternally neglected offspring use help more efficiently than  
208 maternally provisioned offspring, I let  $b_n > b_p$ . An increasing number of helpers increases  
209 the actual benefit received by helped offspring. Each helper splits uniformly its  
210 provisioning effort across second-brood offspring; thus, an increasing number of  
211 second-brood offspring decreases the actual benefit received by helped offspring  
212 (Charlesworth, 1978). The survival of a helper, which is the probability that the helper  
213 becomes a parent itself, decreases by  $c_p$  or  $c_n$  for helping maternally provisioned or  
214 maternally neglected offspring respectively. So,  $c_p$  and  $c_n$  define the costs of acquiescence  
215 which include the effect of missed reproductive opportunities due to delayed dispersal.  
216 Costs of acquiescence that depend on recipient's condition ( $c_p$  or  $c_n$ ) allow to account for  
217 recipients being more or less demanding of food depending on their condition.  
218 Importantly, I assume that maternal influence and offspring resistance are costless (the  
219 effect of their costs is explored elsewhere; González-Forero and Gavrillets, 2013,  
220 González-Forero, 2014).

## 221 **Maternal resource allocation**

222 After recently mated females compete globally for patches, each successful female secures  
223 a patch with resources. Of these resources, the female has an amount  $R$  in energy units to  
224 produce and to provision both first-brood subjects and second-brood offspring. The young

225 mother allocates a fraction  $a_m$  of resource  $R$  to first-brood subjects, and the remaining  
226 fraction to the second brood. Of the resource allocated to first-brood subjects, the mother  
227 allocates a fraction  $e_{m1}$  into producing the offspring while she allocates the rest into  
228 provisioning them. Similarly, of the resource allocated to the second brood, the mother  
229 allocates a fraction  $e_{m2}$  into producing the offspring and the rest into provisioning them  
230 (writing  $e_{m2}$  instead of  $e_{M2}$  makes no difference because it is the same mother that controls  
231 the trait). The energetic cost of producing an average offspring is  $\gamma_\pi$  and that of  
232 provisioning it is  $\gamma_p$ . For simplicity, I assume that the mother produces a continuous rather  
233 than a discrete number of offspring. Hence, the number of offspring of class  $i = 1, 2$   
234 produced by the mother are respectively

$$n_1 = \frac{a_m e_{m1} R}{\gamma_\pi} \quad (1a)$$

$$n_2 = \frac{(1 - a_m) e_{m2} R}{\gamma_\pi}. \quad (1b)$$

235 Thus, the total number of monitored offspring produced by a mother is  
236  $n = n_1 + n_2 = (R/\gamma_\pi)[a_m e_{m1} + (1 - a_m) e_{m2}]$ . The fraction of monitored offspring that are  
237 produced as first-brood subjects is  $\alpha = n_1/n = a_m e_{m1}/[a_m e_{m1} + (1 - a_m) e_{m2}]$ . The number  
238 of offspring of class  $i = 1, 2$  that the mother provisions herself is

$$n_{p1} = \frac{a_m(1 - e_{m1})R}{\gamma_p} \quad (2a)$$

$$n_{p2} = \frac{(1 - a_m)(1 - e_{m2})R}{\gamma_p}. \quad (2b)$$

239 Since the number of maternally provisioned offspring cannot be greater than the number  
240 of offspring ( $n_{pi} \leq n_i$ ), allocation to offspring production has by definition a lower bound  
241 given by  $e_{mi} \geq \gamma_\pi/(\gamma_\pi + \gamma_p)$ , provided that the mother invests in the two broods (i.e.,  
242  $0 < a_m < 1$ ).

243 In the model, the benefit received by helped offspring ( $b_p, b_n$ ) and the cost of

244 acquiescence paid by helpers ( $c_p$ ,  $c_n$ ) depend on the condition of the helped offspring (i.e.,  
245 maternally provisioned or maternally neglected). Hence, for a focal helper, the average  
246 benefit and cost across its helped recipients depend on maternal resource allocation.  
247 Provided that the mother produces the two broods (so  $0 < a_m < 1$ ), the probability that a  
248 class- $i$  offspring is maternally provisioned is  $\zeta_i = n_{pi}/n_i = (\gamma_\pi/\gamma_p)(1 - e_{mi})/e_{mi}$ . Then, for a  
249 focal helper, the average cost of acquiescence and the average benefit for its helped  
250 recipients are

$$c = c_p\zeta_2 + c_n(1 - \zeta_2) \quad (3a)$$

$$b = b_p\zeta_2 + b_n(1 - \zeta_2). \quad (3b)$$

251 Note that the benefit  $b$  and cost  $c$  are under maternal genetic control because they are  
252 functions of maternal allocation to offspring production ( $e_{mi}$ ) and provisioning ( $1 - e_{mi}$ ).

## 253 **Model implementation**

254 I study the coevolution of the population average maternal influence ( $p$ ), offspring costless  
255 resistance ( $q$ ), and maternal resource allocation ( $a$ ,  $e_1$ ,  $e_2$ ). I assume them to be additive,  
256 uncorrelated, quantitative genetic traits. The population is finite, reproduction is sexual  
257 and deterministic so genetic drift is ignored, and the genetic system is either diploid or  
258 haplodiploid. The total resource in the environment measured in energy units is constant  
259 and is divided uniformly among successfully competing mated females, which regulates  
260 population growth. I use the approach of Taylor and Frank (1996) to obtain differential  
261 equations describing evolutionary change. This approach requires differentiation, so in  
262 order to apply it, I use conservative approximations of offspring survival to make it always  
263 differentiable. The mathematical details of the model are given in the Appendix. Additional  
264 notation is summarized in Table 2.

265 I solve numerically the differential equations describing evolutionary change. To  
266 properly initialize the numerical solutions, I first let maternal resource allocation settle at  
267 an equilibrium by allowing it to evolve at a fast pace during 1000 generations without  
268 genetic variation for the other traits. Then, I introduce genetic variation for manipulation  
269 and resistance. Supporting Figs. referenced below are in the Supporting Information 1  
270 (SI1). The computer code used to generate all figures is in the Supporting Information 2  
271 and 3 (SI2 and SI3).

## 272 **Results**

273 The coevolution of maternal influence ( $p$ ), offspring costless resistance ( $q$ ), and maternal  
274 resource allocation ( $a, e_1, e_2$ ) yields the following result. At the start of the evolutionary  
275 process, both maternal influence and offspring resistance evolve (lines on red shade of Fig.  
276 2a). Hence, there is a mother-offspring conflict over offspring helping behavior (red shade  
277 on Fig. 2a-f), and so maternal influence constitutes maternal manipulation during this  
278 stage. Manipulation produces a few helpers while resistance is still ineffective (green line  
279 on red shade of Fig. 2b). With help available, the mother reduces her maternal care toward  
280 second-brood offspring (red line on red shade of Fig. 2c). Thus, first-brood helpers help an  
281 increasing proportion of maternally neglected second-brood offspring ( $\zeta_2$  decreases from  
282 1). Since by assumption maternally neglected offspring use help more efficiently, the  
283 average benefit received by second-brood offspring increases [blue line in Fig. 2d; see eq.  
284 (3b)]. The average benefit reaches a sufficiently high level that resistance becomes  
285 disfavored [non-shaded area in Fig. 2a; see eq. (A10b)]. Because there are no costs of  
286 resistance, resistance being disfavored means that the conflict disappears and maternal  
287 influence stops being manipulation as defined above. First-brood subjects become

288 effectively sterile because the cost for helping maternally neglected offspring is here  
289 maximal ( $c_n = s_0$ ) and so the probability that first-brood subjects become parents (i.e., their  
290 survival to parenthood) evolves to zero (Fig. 2e). Daughters that successfully become  
291 mothers are no longer raised by the mother but by sterile workers (Fig. 2f). At the end of  
292 this coevolutionary process, there is reproductive division of labor where reproductives  
293 (i.e., non-sterile offspring, which are the second brood) are produced by the mother but are  
294 raised by workers (Fig. 2b,c,e), workers do not reproduce (Fig. 2e), and workers are  
295 maternally induced to help but are not selected to resist (Fig. 2a). Because of the final lack  
296 of conflict, the final maternal influence fits the notion of signaling: it is a non-conflicting  
297 influence that evolved for the purpose of altering offspring's phenotype while offspring  
298 evolved to attend to it (Maynard Smith and Harper, 2003). Therefore, despite costless  
299 resistance, maternal manipulation generates stable eusociality and an associated maternal  
300 signal that induces offspring to be workers. This process occurs both in haplodiploids and  
301 diploids (Supporting Figs. 3-5).

302 To assess whether the above process is likely to yield eusociality, I compare the model  
303 with two extreme possibilities in which either the mother or the offspring are in full control  
304 of offspring's helping behavior. For the first extreme possibility, I set both the initial  
305 resistance and its genetic variation to zero. I refer to this case as maternal control (MC). For  
306 the second extreme possibility, I use an otherwise analogous model except that staying in  
307 the natal nest is only under offspring control rather than being influenced by the mother  
308 (see Offspring control in Appendix). I refer to this case as offspring control (OC). I refer to  
309 the intermediate case where maternal influence and offspring resistance can coevolve as  
310 shared control (SH). Under the specific parameter values used above for shared control  
311 (Fig. 2a-f), eusociality fails to evolve with offspring control (Fig. 2g-l and Supporting Figs.

312 6,7). Systematic exploration of the parameter space shows that the parameter region in  
313 which stable eusociality is obtained is consistently largest with maternal control, followed  
314 by shared control, and smallest with offspring control (Fig. 3 and Supporting Figs. 9-14).  
315 This result contrasts with previous understanding indicating that the parameter region for  
316 stable eusociality should be identical for shared control and offspring control when there  
317 are no direct costs associated with resistance (e.g., Craig, 1979, Keller and Nonacs, 1993,  
318 Cant, 2006, Uller and Pen, 2011). Specifically, stable eusociality is here obtained with  
319 smaller benefit-cost ratios under shared control than under offspring control even though  
320 resistance to the maternal influence is entirely costless (note that  $b_p$  and  $c_p$  give the initial  
321 benefit and cost for helping because mothers initially provision all their offspring). This  
322 occurs more markedly when (1) maternally neglected offspring are substantially more  
323 efficient help users than maternally provisioned offspring (i.e.,  $b_n \gg b_p$ ), and (2) the  
324 survival of maternally provisioned offspring can increase only moderately by being helped  
325 (i.e.,  $s_0 \rightarrow s_{\max}$ ; see Figs. 3a,b and Supporting Figs. 11a,b and 13a,b). The latter condition  
326 states that the survival of maternally provisioned offspring must be close to saturation,  
327 which occurs when their survival without help ( $s_0$ ) is already close to the maximum  $s_{\max}$   
328 they can have with help.

## 329 **Discussion**

330 In eusocial taxa, queens exert substantial influence on their colonies by prompting  
331 offspring to develop or maintain worker phenotypes (e.g., Wilson, 1971, Fletcher and Ross,  
332 1985, O'Donnell, 1998, Le Conte and Hefetz, 2008, Van Oystaeyen *et al.*, 2014). Yet, how  
333 queen influence evolved and why it is so common remains poorly understood (Oi *et al.*,  
334 2015). One possible reason for the commonality of maternal influence is that it is a causal

335 factor in the origin of eusociality (Alexander, 1974, Michener and Brothers, 1974,  
336 Linksvayer and Wade, 2005, Russell and Lummaa, 2009). Eusociality can evolve under  
337 relatively lax conditions if the maternal influence is manipulative and resistance to it is  
338 costly (Charlesworth, 1978, González-Forero and Gavrilets, 2013). Otherwise, with costless  
339 resistance, eusociality via manipulation is expected to be evolutionarily unstable (Trivers,  
340 1974, Craig, 1979, Keller and Nonacs, 1993). In contrast to this expectation, I show here that  
341 maternal manipulation with costless resistance can yield stable eusociality. The reason is  
342 that maternal care reduction increases the benefit that offspring receive from help (further  
343 explained below). This result relies on the assumption that offspring receiving no maternal  
344 care use help more efficiently than offspring receiving maternal care.

### 345 **Conflict resolution: from manipulation to honest signaling**

346 Depending on whether helping behavior is controlled by mother, offspring, or both, four  
347 broad cases can be considered. First, with *maternal* control and ignoring offspring  
348 resistance, eusociality evolves under particularly small benefit-cost ratios (e.g.,  
349 Charlesworth, 1978, Kapheim *et al.*, 2015; eusociality with MC in Fig. 3). Second, with  
350 *offspring* control, eusociality requires larger benefit-cost ratios (e.g., Charlesworth, 1978,  
351 Kapheim *et al.*, 2015; eusociality with OC in Fig. 3). Third, with *shared* control between  
352 mother and offspring and *costly* resistance, eusociality evolves and is stable under  
353 intermediately small benefit-cost ratios (e.g., González-Forero and Gavrilets, 2013,  
354 González-Forero, 2014). Fourth, with *shared* control and *costless* resistance, eusociality  
355 evolves and is stable under exactly the same benefit-cost ratios as with offspring control  
356 (e.g., Craig, 1979, Keller and Nonacs, 1993, Godfray, 1995, Cant, 2006, Uller and Pen, 2011,  
357 González-Forero and Gavrilets, 2013). These scenarios have suggested that, when



358 resistance is costless, considering offspring control should be sufficient to explain the  
359 evolution of offspring helping behavior (Trivers and Hare, 1976, Craig, 1979, Cant, 2006,  
360 Uller and Pen, 2011, Kuijper and Hoyle, 2015). In contrast, the results obtained here show  
361 that with shared control and costless resistance, eusociality can still evolve and be stable  
362 under intermediately small benefit-cost ratios. Indeed, with maternal manipulation, an  
363 initially moderate benefit can evolve and increase sufficiently that helping becomes  
364 favored. This is possible because the mother initially produces ineffectively resisting  
365 helpers that allow her to reduce maternal care, thereby increasing the benefit and  
366 stabilizing eusociality. Without maternal manipulation, a moderate benefit does not  
367 increase to favor helping. Since in this case the mother does not have helpers, she does not  
368 evolve reduced maternal care that would allow the benefit to increase.

369 Hence, the evolution of the benefit eliminates the mother-offspring conflict introduced  
370 by manipulation. In a previous study where the benefit is controlled by helpers because  
371 they control their helping efficiency, the mother-offspring conflict also disappears  
372 (González-Forero, 2014). In the present study the benefit is genetically controlled by the  
373 mother, since maternal care determines the efficiency of help use by offspring [see eq.  
374 (3b)]. These studies fall within a larger class of mathematical models showing that the  
375 evolution of fitness payoffs (here  $b$  and  $c$ ) can reduce, eliminate, or increase the level of  
376 conflict (Worden and Levin, 2007, Akçay and Roughgarden, 2011, González-Forero, 2014,  
377 Stewart and Plotkin, 2014).

378 After the mother-offspring conflict disappears, the maternal influence becomes a signal  
379 (*sensu* Maynard Smith and Harper, 2003). This signal only informs first-brood offspring  
380 that they can have recipients of help if they stay to help. Second-brood offspring do not  
381 receive the signal. Helping is then favored as long as it is expressed only when receiving the

382 signal, otherwise it could be expressed by second-brood individuals who have no brood to  
383 help. The signal can thus be maintained in evolutionary time to maintain helping  
384 (González-Forero, 2014). Given the final absence of mother-offspring conflict over helping  
385 behavior, mother and offspring can then evolve in a mutually beneficial way allowing the  
386 signal to remain honest. Mutually beneficial coevolution permits subsequent elaborations  
387 of the maternal signal. If offspring evolve the ability to provision their mother, offspring  
388 could become sensitive to maternal fertility since they affect it directly (see below). Then,  
389 the maternal signal could evolve into an honest signal of queen fertility. This pathway links  
390 the origin of eusociality to the evidence suggesting that queen pheromones act as honest  
391 signaling of the queen's reproductive health (Heinze and d'Ettoire, 2009, van Zweden *et al.*,  
392 2014).

### 393 **Why can eusociality via maternal manipulation be stable when resistance** 394 **is costless?**

395 The model shows that selection for resistance disappears as the mother reduces maternal  
396 care and reallocates resources into producing more offspring. The benefit increases as  
397 maternal care decreases because by assumption maternally neglected offspring use help  
398 more efficiently than maternally provisioned offspring. The benefit can increase  
399 sufficiently that selection for resistance is eliminated because first- and second-brood  
400 offspring are siblings (in particular, full siblings for the parameter values explored here)  
401 [Hamilton, 1964; see eq. (A10b)]. Given a mathematical equivalence between kin and  
402 group selection (Frank, 2012), resistance becomes disfavored once the benefit is large  
403 enough that kin or group selection favor acquiescence to the maternal influence.

404 In the model, acquiescence becomes favored because of maternal care reduction but

405 not because of maternal fertility increase. There are two reasons for this. First, maternal  
406 fertility remains largely constant because maternal resource decreases with population  
407 growth. Maternal resource is obtained from environmental resource divided among  
408 mothers so it depends on population size. There is a trade-off between offspring  
409 production and provisioning [defined by  $e_{mi}$  in eqs. (1) and (2)], so reduction in  
410 provisioning releases resources for offspring production (see Savage *et al.*, 2015 and Kramer  
411 *et al.*, 2015). The population grows once the mother starts to reduce care toward  
412 second-brood offspring which allows her to produce more offspring (Supporting Fig. 4i).  
413 Then, maternal resource becomes smaller with population growth which limits the ability  
414 of the mother to increase her fertility. Consequently, the number of first-brood offspring  $n_1$   
415 changes little (Supporting Fig. 4f) as maternal resource  $R$  decreases with an increasing  
416 population size (Supporting Fig. 4n), while the number of maternally provisioned  
417 second-brood offspring  $n_{2p}$  decreases to zero (Supporting Fig. 4h). Therefore, although the  
418 benefit  $b$  can increase as the number of first-brood offspring increases, the observed  
419 increase in the benefit  $b$  is primarily due to maternal care reduction. This effect of  
420 competition would not be easily captured by assuming an infinite or constant population  
421 size or by imposing a carrying capacity.

422       Second, acquiescence does not become favored because of an increase of maternal  
423 fertility since the benefit  $b$  that renders resistance disfavored [eq. (A10b)] is not a fertility  
424 benefit to the mother and is not weighted by relatedness to the mother. Instead, this  
425 benefit  $b$  is a survival benefit to siblings and is weighted by relatedness to siblings. In the  
426 model, helpers do not directly increase maternal fertility. To see this, note that, from eqs.  
427 (1), maternal fertility  $f_i$  is constant with respect to offspring resistance  $q_1$ . Helpers affect  
428 maternal fertility only indirectly by allowing the mother to decrease maternal care and

429 redirect the freed resources into additional offspring production. Thus, maternal fertility  
430 increase depends on whether the mother chooses to use the help by reducing care and  
431 increasing her fertility. Because this choice is here entirely genetically determined, the  
432 mother can only increase her fertility as she acquires the genes for this new choice. So,  
433 selection is unable to favor acquiescence due to increased maternal fertility if the fertility  
434 benefits to the mother occur only generations later. Now, helpers could directly help  
435 maternal fertility if they provisioned the mother thus giving her additional resource for  
436 offspring production (e.g., if maternal resource  $R$  were a function of offspring resistance  
437  $q_1$ ). However, provisioning the mother could demand a greater effect of the maternal  
438 influence than just causing offspring to stay as adults. This is because helpers would have  
439 to provision an adult rather than a young which may require additional changes to the  
440 normal behavioral repertoire of the offspring (Hunt, 2007). Nevertheless, an important  
441 extension of the model is to allow for the evolution of offspring provisioning of the mother  
442 as this is a widespread behavior in extant eusocial taxa (Wcislo and Gonzalez, 2006). Such  
443 an extension could allow for a marked increase in maternal fertility, which is not recovered  
444 in the model (Fig. 2b,c and Supporting Fig. 4f). These observations highlight the  
445 importance of detailing how helping occurs and so who the direct recipient of help is: here,  
446 it is second-brood offspring rather than the mother.

#### 447 **The assumption of efficient help use**

448 The assumption that maternally neglected offspring use help more efficiently than  
449 maternally provisioned offspring relies on the expectation that maternally neglected  
450 offspring are under stronger pressure to regain survival. This assumption must be tested by  
451 assessing whether the survival of maternally neglected offspring increases faster than that

452 of maternally provisioned offspring with respect to the ratio of helpers to recipients when  
453 this ratio approaches zero (see Supporting Figs. 1 and 2).

454 The more efficient help use by maternally neglected offspring is a biological assumption  
455 that must be tested rather than a mathematical consequence of the model. A similar  
456 mathematical consequence of the model is that the marginal benefit received by  
457 maternally neglected offspring is larger than that obtained by maternally provisioned  
458 offspring. This is because maternally neglected offspring die if not helped and they can  
459 reach the same maximum survival of maternally provisioned offspring. Then, it can be  
460 checked that, for the differentiable approximations of survival used, the marginal benefit  
461 for maternally neglected offspring (which is the negative of the derivative of  $s_2$  with respect  
462 to  $Q$  setting  $\zeta_2 = 0$ ) is larger than that for maternally provisioned offspring even if  $b_n = b_p$ .  
463 However, such larger marginal benefit is not enough to eliminate the mother-offspring  
464 conflict if  $b_n = b_p$  (results not shown). Instead, the biological efficiency of help use must be  
465 larger for maternally neglected offspring ( $b_n > b_p$ ), which can be tested as described in the  
466 previous paragraph.

## 467 **Model predictions**

468 When the assumption of efficient help use holds, the model makes predictions to discern  
469 whether eusociality is likely to have originated from maternal manipulation rather than  
470 from offspring control, particularly when resistance is costless. One prediction is that  
471 stable eusociality via manipulation and maternal care reduction is more likely when the  
472 survival of maternally provisioned offspring can increase only moderately with help; that is,  
473 their survival must be close to saturation (Fig. 3a,b and Supporting Figs. 11a,b and 13a,b).  
474 On the contrary, eusociality via offspring control does not require that the survival of

475 maternally provisioned offspring is close to saturation (Fig. 3 and Supporting Figs. 9-14).

476 In addition, the disappearance of the mother-offspring conflict predicts the occurrence  
477 of “conflict relics”. By this I mean a trait (e.g., morphological, molecular, or behavioral) that  
478 ancestrally served as an adaptation for manipulation or resistance but lost this function.  
479 For example, conflict relics predict the putative conflicting genes to have a high within  
480 species genetic diversity (reflecting conflict) that is shared between recently diverged  
481 species (reflecting that conflict is ancestral but not current) (see Ostrowski *et al.*, 2015).  
482 Because conflict relics are not expected if eusociality originates via offspring control,  
483 conflict relics also allow to disentangle manipulation and offspring control as a source of  
484 eusociality, even with costless resistance.

## 485 **Further biological implications**

486 Several points in the model warrant further comment. First, reproductive value does not  
487 drive the process described here although it evolves and becomes small for helpers and  
488 large for recipients. Previous theory shows that if helping entails *fertility* costs and benefits,  
489 helping is favored when helpers’ reproductive value is lower than that of helped individuals  
490 (West Eberhard, 1975, Frank, 1998), which has prompted hypotheses for the evolution of  
491 eusociality (e.g., Holman, 2014). Here helping entails only *survival* costs and benefits, and  
492 so reproductive values cannot change the direction of selection and instead the class  
493 equilibrium frequencies ( $u_i$ ) play the analogous role [i.e., the derivatives of  $f_i$  in eqs. (A9)  
494 are here zero]. Still, class equilibrium frequencies do not cause the observed change in  
495 selection for resistance since here they affect the direction of selection via the sex ratio in  
496 the two broods [i.e., the  $\eta_j \sigma_j$  occurring in  $r_{ji}$  in eqs. (A10)], which I assumed even and  
497 constant. Yet, in the model, first-brood individuals evolve low reproductive values as their

498 survival decreases, while second-brood individuals evolve high reproductive values as their  
499 survival increases [eqs. (A16c) and (A16d) and Supporting Figs. 2l and 3l], which matches  
500 the expected pattern.

501 Second, the model considers a finite population, the size of which is regulated by the  
502 finite environmental resource without imposing a carrying capacity. Then, population size  
503 and the number of individuals of different classes can evolve as trait values change  
504 (Supporting Figs. 2i,j and 3i,j). This aspect differs from previous models that usually  
505 assume infinite or constant population sizes. Third, genetic variances are important on  
506 whether eusociality is stabilized. Although the model's complexity prevents analytical  
507 treatment, a simpler version of the model suggests that stable eusociality via manipulation  
508 and care reduction requires a condition of the form  $br + (1 - q_0)A > c$  which allows  
509 acquiescence to become favored as the benefit evolves (see eq. A3.50e in González-Forero,  
510 2013). In this inequality,  $r$  is relatedness of first- to second-brood offspring,  $q_0$  is the initial  
511 resistance, and  $A$  is proportional to the ratio of genetic variances of maternally controlled  
512 traits over the genetic variance of offspring resistance. This inequality suggests that large  
513 genetic variances for maternally controlled traits relative to offspring controlled traits  
514 would favor the disappearance of conflict via this process. Fourth, the model describes  
515 parental care as provisioning, but it can be equivalently taken as nest defense directed to  
516 individuals (Cocroft, 2002). Parental care in the form of defense is important because it is  
517 thought to have been key for the origin of isopteran eusociality (Korb *et al.*, 2012). In this  
518 interpretation of the model, reduced maternal care toward second-brood offspring refers to  
519 reduced maternal investment into defending individual second-brood offspring.

520 Finally, two underlying assumptions of the models can be relevant to account for the  
521 high incidence of eusociality in hymenoptera and its occurrence in termites. Without

522 maternal influence, a mutant gene for helping must have a dual function: to trigger the  
523 expression of help and to be expressed only in first-brood individuals of the right sex. This  
524 expression pattern can occur if first-brood individuals of the right sex in the ancestral  
525 population already use environmental cues that properly trigger the helping gene  
526 expression. With maternal influence, it is the maternal influence gene that must have the  
527 analogous dual function: to trigger the expression of maternal influence and to be  
528 expressed so that only first-brood offspring of the right sex are influenced. This dual  
529 function of a maternal influence gene is particularly feasible in hymenoptera. Indeed,  
530 hymenopteran mothers control the sex of their offspring by fertilizing eggs (Verhulst *et al.*,  
531 2010) and their first offspring are often female (Hunt, 2007). Hence, the dual function for  
532 the maternal influence gene occurs if the gene is expressed only early in the reproductive  
533 phase of a hymenopteran mother. In diploids, the dual ability of the maternal influence  
534 gene can also be facilitated by early expression if the early brood is composed by the sex or  
535 sexes providing parental care. This requirement is likely to have been met by isopteran  
536 ancestors given their probable ancestral biparental care (Klass *et al.*, 2008).

## 537 **Conclusion**

538 If maternally neglected offspring are particularly efficient help users, maternal  
539 manipulation and maternal care reduction can generate stable eusociality when resistance  
540 to manipulation is costless. This scenario requires ancestral parental care, and that  
541 maternal manipulation can be executed and favored. With these conditions, ancestral  
542 manipulation can then evolve into honest maternal signaling.



## 543 **Acknowledgments**

544 I thank Sergey Gavrilets, Kelly Rooker, Jeremy Auerbach, Xavier Thibert-Plante, Laurent  
545 Lehmann, Charles Mullon, Simon Powers, Slimane Dridi, Matthias Wubs, Valeria Montano,  
546 Danielle Mersch, Laurent Keller, Luke Holman, and two anonymous reviewers for  
547 discussion or comments on the manuscript that vastly improved it. I thank L. Holman who  
548 refereeing the manuscript suggested to keep the term manipulation for conflict situations  
549 to better agree with common usage of the concept. I thank S. Gavrilets for access to the  
550 Volos computer cluster where I ran numerical simulations conducive to the results  
551 reported here. I was funded by a Graduate Research Assistantship from the National  
552 Institute for Mathematical and Biological Synthesis (NIMBioS). NIMBioS is sponsored by  
553 the National Science Foundation, the U.S. Department of Homeland Security, and the U.S.  
554 Department of Agriculture through NSF Award # EF-0832858, with additional support from  
555 The University of Tennessee, Knoxville. Volos is funded by the NIH grant # GM-56693 to S.  
556 Gavrilets.

## 557 **References**

- 558 Akçay, E. and Roughgarden, J. (2011). The evolution of payoff matrices: providing  
559 incentives to cooperate. *Proc. Roy. Soc. B*, **278**, 2198–2206.
- 560 Alexander, R. D. (1974). The evolution of social behavior. *Annu. Rev. Ecol. Syst.*, **5**, 323–383.
- 561 Andersson, M. (1984). The evolution of eusociality. *Ann. Rev. Ecol. Syst.*, **15**, 165–189.
- 562 Beggs, K. T., Glendining, K. A., Marechal, N. M., Vergoz, V., Nakamura, I., Slessor, K. N., and

- 563 Mercer, A. R. (2007). Queen pheromone modulates brain dopamine function in worker  
564 honey bees. *Proc. Nat. Acad. Sci. USA*, **104**, 2460–2464.
- 565 Bhadra, A., Mitra, A., Deshpande, S. A., Chandrasekhar, K., Naik, D. G., Hefetz, A., and  
566 Gadagkar, R. (2010). Regulation of reproduction in the primitively eusocial wasp  
567 *Ropalidia marginata*: on the trail of the queen pheromone. *J. Chem. Ecol.*, **36**, 424–431.
- 568 Boomsma, J. J. (2009). Lifetime monogamy and the evolution of eusociality. *Phil. Trans. R.*  
569 *Soc. B*, **364**, 3191–3207.
- 570 Bourke, A. F. G. and Ratnieks, F. L. W. (1999). Kin conflict over caste determination in social  
571 hymenoptera. *Behav. Ecol. Sociobiol.*, **46**, 287–297.
- 572 Brand, N. and Chapuisat, M. (2012). Born to be bee, fed to be worker? The caste system of a  
573 primitively eusocial insect. *Front. Zool.*, **9**, 35.
- 574 Cant, M. A. (2006). A tale of two theories: parent-offspring conflict and reproductive skew.  
575 *Anim. Behav.*, **71**, 255–263.
- 576 Charlesworth, B. (1978). Some models of the evolution of altruistic behaviour between  
577 siblings. *J. Theor. Biol.*, **72**, 297–319.
- 578 Charlesworth, B. (1994). *Evolution in Age-Structured Populations*. Cambridge Univ. Press,  
579 Cambridge, UK, 2nd edition.
- 580 Croft, R. B. (2002). Antipredator defense as a limited resource: unequal predation risk in  
581 broods of an insect with maternal care. *Behav. Ecol.*, **13**, 125–133.
- 582 Craig, R. (1979). Parental manipulation, kin selection, and the evolution of altruism.  
583 *Evolution*, **33**, 319–334.

- 584 Davies, N. G. and Gardner, A. (2014). Evolution of paternal care in diploid and haplodiploid  
585 populations. *J. Evol. Biol.*, **27**, 1012–1019.
- 586 Dawkins, R. (1978). Replicator selection and the extended phenotype. *Z. Tierpsychol.*, **47**,  
587 61–76.
- 588 Dawkins, R. (1982). *The Extended Phenotype*. Oxford Univ. Press, Oxford, UK.
- 589 Dawkins, R. and Krebs, J. R. (1978). Animal signals: information or manipulation? In J. R.  
590 Krebs and N. B. Davies, editors, *Behavioural Ecology*, pages 282–309. Blackwell Scientific  
591 Publications.
- 592 Dheilly, N. M., Maure, F., Ravallec, M., Galinier, R., Doyon, J., Duval, D., Leger, L., Volkoff,  
593 A.-N., Missé, D., Nidelet, S., Demolombe, V., Brodeur, J., Gourbal, B., Thomas, F., and  
594 Mitta, G. (2015). Who is the puppet master? Replication of a parasitic wasp-associated  
595 virus correlates with host behaviour manipulation. *Proc. R. Soc. B*, **282**, 20142773.
- 596 Dobata, S. (2012). Arms race between selfishness and policing: two-trait quantitative  
597 genetic model for caste fate conflict in eusocial hymenoptera. *Evolution*, **66**, 3754–3764.
- 598 Fletcher, D. J. C. and Ross, K. G. (1985). Regulation of reproduction in eusocial  
599 hymenoptera. *Ann. Rev. Entomol.*, **30**, 319–343.
- 600 Frank, S. A. (1997). Multivariate analysis of correlated selection and kin selection, with an  
601 ESS maximization method. *J. Theor. Biol.*, **189**, 307–316.
- 602 Frank, S. A. (1998). *Foundations of Social Evolution*. Princeton Univ. Press.
- 603 Frank, S. A. (2012). Natural selection. III. Selection versus transmission and the levels of  
604 selection. *J. Evol. Biol.*, **25**, 227–243.

- 605 Gardner, A. (2012). Evolution of maternal care in diploid and haplodiploid populations. *J.*  
606 *Evol. Biol.*, **25**, 1479–1486.
- 607 Godfray, H. C. J. (1995). Evolutionary theory of parent-offspring conflict. *Nature*, **376**,  
608 133–138.
- 609 González-Forero, M. (2013). *Evolution of acquiescence to manipulation*. Ph.D. thesis, Univ.  
610 of Tennessee.
- 611 González-Forero, M. (2014). An evolutionary resolution of manipulation conflict.  
612 *Evolution*, **68**, 2038–2051.
- 613 González-Forero, M. and Gavrilets, S. (2013). Evolution of manipulated behavior. *Am. Nat.*,  
614 **182**, 439–451.
- 615 Hamilton, W. D. (1964). The genetical evolution of social behaviour I. *J. Theor. Biol.*, **7**, 1–16.
- 616 Heinze, J. and d’Ettorre, P. (2009). Honest and dishonest communication in social  
617 Hymenoptera. *J. Exp. Biol.*, **212**, 1775–1779.
- 618 Holman, L. (2014). Conditional helping and evolutionary transitions to eusociality and  
619 cooperative breeding. *Behav. Ecol.*, **25**, 1173–1182.
- 620 Holman, L., Jørgensen, C. G., Nielsen, J., and d’Ettorre, P. (2010). Identification of an ant  
621 queen pheromone regulating worker sterility. *Proc. Biol. Sci.*, **277**, 3793–3800.
- 622 Hughes, W. O. H., Oldroyd, B. P., Beekman, M., and Ratnieks, F. L. W. (2008). Ancestral  
623 monogamy shows kin selection is key to the evolution of eusociality. *Science*, **320**,  
624 1213–1216.
- 625 Hunt, J. H. (2007). *The Evolution of Social Wasps*. Oxford Univ. Press, Oxford.

- 626 Kamakura, M. (2011). Royalactin induces queen differentiation in honeybees. *Nature*, **473**,  
627 478–483.
- 628 Kapheim, K. M., Bernal, S. P., Smith, A. R., Nonacs, P., and Wcislo, W. T. (2011). Support for  
629 maternal manipulation of developmental nutrition in a facultatively eusocial bee,  
630 *Megalopta genalis* (Halictidae). *Behav. Ecol. Sociobiol.*, **65**, 1179–1190.
- 631 Kapheim, K. M., Nonacs, P., Smith, A. R., Wayne, R. K., and Wcislo, W. T. (2015). Kinship,  
632 parental manipulation and evolutionary origins of eusociality. *Proc. R. Soc. B*, **282**,  
633 20142886.
- 634 Keller, L. and Nonacs, P. (1993). The role of queen pheromones in social insects: queen  
635 control or queen signal? *Anim. Behav.*, **45**, 787–794.
- 636 Klass, K.-D., Nalepa, C., and Lo, N. (2008). Wood-feeding cockroaches as models for termite  
637 evolution (Insecta: Dictyoptera): *Cryptocercus* vs. *Parasphaeria boleiriana*. *Mol.*  
638 *Phylogenet. Evol.*, **46**, 809–817.
- 639 Korb, J., Buschmann, M., Schafberg, S., Liebig, J., and Bagnères, A.-G. (2012). Brood care  
640 and social evolution in termites. *Proc. R. Soc. B*, **279**, 2667–2671.
- 641 Kramer, J., Thesing, J., and Meunier, J. (2015). Negative association between parental care  
642 and sibling cooperation in earwigs: a new perspective on the early evolution of family  
643 life? *J. Evol. Biol.*, **28**, 1299–1308.
- 644 Kuijper, B. and Hoyle, R. B. (2015). When to rely on maternal effects and when on  
645 phenotypic plasticity? *Evolution*, **69**, 950–968.
- 646 Le Conte, Y. and Hefetz, A. (2008). Primer pheromones in social hymenoptera. *Annu. Rev.*  
647 *Entomol.*, **53**, 523–542.

- 648 Leslie, P. H. (1948). Some further remarks on the use of matrices in population  
649 mathematics. *Biometrika*, **35**(213-245).
- 650 Lin, N. and Michener, C. D. (1972). Evolution of sociality in insects. *Q. Rev. Biol.*, **47**,  
651 131–159.
- 652 Linksvayer, T. A. and Wade, M. J. (2005). The evolutionary origin and elaboration of  
653 sociality in the aculeate hymenoptera: maternal effects, sibsocial effects, and  
654 heterochrony. *Q. Rev. Biol.*, **80**, 317–336.
- 655 Lo, N., Hayashi, Y., and Kitade, O. (2009). Should environmental caste determination be  
656 assumed for termites? *Am. Nat.*, **173**, 848–853.
- 657 Lohse, K., Gutierrez, A., and Kaltz, O. (2006). Experimental evolution of resistance in  
658 *Paramecium caudatum* against the bacterial parasite *Holospora undulata*. *Evolution*, **60**,  
659 1177–1186.
- 660 Matsuura, K., Himuro, C., Yokoi, T., Yamamoto, Y., Vargo, E. L., and Keller, L. (2010).  
661 Identification of a pheromone regulating caste differentiation in termites. *Proc. Nat.*  
662 *Acad. Sci. USA*, **107**, 12963–12968.
- 663 Maure, F., Brodeur, J., Ponlet, N., Doyon, J., Firlej, A., Elguero, E., and Thomas, F. (2011). The  
664 cost of a bodyguard. *Biol. Lett.*, **7**, 843–846.
- 665 Maure, F., Daoust, S. P., Brodeur, J., Mitta, G., and Thomas, F. (2013). Diversity and evolution  
666 of bodyguard manipulation. *J. Exp. Biol.*, **216**, 36–42.
- 667 Maynard Smith, J. and Harper, D. (2003). *Animal Signals*. Oxford Univ. Press, New York.
- 668 Michener, C. D. (1974). *The Social Behavior of the Bees*. Belknap Press, Cambridge, MA.

- 669 Michener, C. D. (1990). Reproduction and castes in social halictine bees. In W. Engels,  
670 editor, *Social insects: an evolutionary approach to castes and reproduction*, pages 77–121.  
671 Springer, Berlin.
- 672 Michener, C. D. and Brothers, D. J. (1974). Were workers of eusocial Hymenoptera initially  
673 altruistic or oppressed? *Proc. Natl. Acad. Sci. USA*, **71**, 671–674.
- 674 O'Donnell, S. (1998). Reproductive caste determination in eusocial wasps (Hymenoptera:  
675 Vespidae). *Annu. Rev. Entomol.*, **43**, 323–346.
- 676 Oi, C. A., van Zweden, J. S., Oliveira, R. C., Van Oystaeyen, A., Nascimento, F. S., and  
677 Wenseleers, T. (2015). The origin and evolution of social insect queen pheromones:  
678 Novel hypotheses and outstanding problems. *Bioessays*, **37**, 808–821.
- 679 Ostrowski, E. A., Shen, Y., Tian, X., Sucgang, R., Jiang, H., Qu, J., Katoh-Kurasawa, M., Brock,  
680 D. A., Dinh, C., Lara-Garduno, F, Lee, S. L., Kovar, C. L., Dinh, H. H., Korchina, V., Jackson,  
681 L., Patil, S., Han, Y., Chaboub, L., Shaulsky, G., Muzny, D. M., Worley, K. C., Gibbs, R. A.,  
682 Richards, S., Kuspa, A., Strassmann, J. E., and Queller, D. C. (2015). Genomic signatures  
683 of cooperation and conflict in the social amoeba. *Curr. Biol.*, **25**, 1–5.
- 684 Poulin, R. (2010). Parasite manipulation of host behavior: An update and frequently asked  
685 questions. volume 41 of *Advances in the Study of Behavior*, pages 151–186. Academic  
686 Press.
- 687 Ratnieks, F. L. W. (1988). Reproductive harmony via mutual policing by workers in eusocial  
688 hymenoptera. *Am. Nat.*, **132**, 217–236.
- 689 Ratnieks, F. L. W. and Reeve, H. K. (1992). Conflict in single-queen Hymenopteran societies:

- 690 the structure of conflict and processes that reduce conflict in advanced eusocial species.
- 691 *J. Theor. Biol.*, **158**, 33–65.
- 692 Ratnieks, F. L. W., Foster, K. R., and Wenseleers, T. (2006). Conflict resolution in insect  
693 societies. *Annu. Rev. Entomol.*, **51**, 581–608.
- 694 Reeve, H. K. and Keller, L. (2001). Tests of reproductive-skew models in social insects.  
695 *Annu. Rev. Entomol.*, **46**, 347–385.
- 696 Reeve, H. K., Peters, J. M., Nonacs, P., and Starks, P. T. (1998). Dispersal of first “workers” in  
697 social wasps: causes and implications of an alternative reproductive strategy. *Proc. Nat.*  
698 *Acad. Sci. USA*, **95**, 13737–13742.
- 699 Russell, A. F. and Lummaa, V. (2009). Maternal effects in cooperative breeders: from  
700 hymenopterans to humans. *Phil. Trans. R. Soc. B*, **364**, 1143–1167.
- 701 Russell, A. F., Langmore, N. E., Cockburn, A., Astheimer, L. B., and Kilner, R. M. (2007).  
702 Reduced egg investment can conceal helper effects in cooperatively breeding birds.  
703 *Science*, **317**, 941–944.
- 704 Savage, J. L., Russell, A. F., and Johnstone, R. A. (2015). Maternal allocation in cooperative  
705 breeders: should mothers match or compensate for expected helper contributions?  
706 *Anim. Behav.*, **102**, 189–197.
- 707 Schwander, T., Humbert, J.-Y., Brent, C. S., Helms Cahan, S., Chapuis, L., Renai, E., and  
708 Keller, L. (2008). Maternal effect on female caste determination in a social insect. *Curr.*  
709 *Biol.*, **18**, 265–269.
- 710 Schwander, T., Lo, N., Beekman, M., Oldroyd, B. P., and Keller, L. (2010). Nature versus  
711 nurture in social insect caste differentiation. *Trends. Ecol. Evol.*, **25**, 275–282.



- 712 Shen, S.-F. and Reeve, H. K. (2010). Reproductive skew theory unified: the general bordered  
713 tug-of-war model. *J. Theor. Biol.*, **263**, 1–12.
- 714 Stewart, A. J. and Plotkin, J. B. (2014). Collapse of cooperation in evolving games. *Proc.*  
715 *Natl. Acad. Sci. USA*, **111**, 17558–17563.
- 716 Taylor, P. D. (1990). Allele frequency change in a class-structured population. *Am. Nat.*, **135**,  
717 95–106.
- 718 Taylor, P. D. and Frank, S. A. (1996). How to make a kin selection model. *J. Theor. Biol.*, **180**,  
719 27–37.
- 720 Trivers, R. L. (1974). Parent-offspring conflict. *Am. Zool.*, **14**, 249–264.
- 721 Trivers, R. L. and Hare, H. (1976). Haplodiploidy and the evolution of the social insect.  
722 *Science*, **191**, 249–263.
- 723 Uller, T. and Pen, I. (2011). A theoretical model of the evolution of maternal effects under  
724 parent-offspring conflict. *Evolution*, **65**, 2075–2084.
- 725 Van Oystaeyen, A., Oliveira, R. C., Holman, L., van Zweden, J. S., Romero, C., Oi, C. A.,  
726 d’Ettorre, P., Khalesi, M., Billen, J., Wäckers, E., Millar, J. G., and Wenseleers, T. (2014).  
727 Conserved class of queen pheromones stops social insect workers from reproducing.  
728 *Science*, **343**, 287–290.
- 729 van Zweden, J. S., Bonckaert, W., Wenseleers, T., and d’Ettorre, P. (2014). Queen signaling in  
730 social wasps. *Evolution*, **68**, 976–986.
- 731 Verhulst, E. C., Beukeboom, L. W., and van de Zande, L. (2010). Maternal control of  
732 haplodiploid sex determination in the wasp *Nasonia*. *Science*, **328**, 620–623.

- 733 Wade, M. J. (2001). Maternal effect genes and the evolution of sociality in haplo-diploid  
734 organisms. *Evolution*, **55**, 453–458.
- 735 Wcislo, W. T. and Gonzalez, V. H. (2006). Social and ecological contexts of trophallaxis in  
736 facultatively social sweat bees, *Megalopta genalis* and *M. ecuadoria* (Hymenoptera,  
737 Halictidae). *Insectes Soc.*, **53**, 220–225.
- 738 Wenseleers, T., Ratnieks, F. L. W., and Billen, J. (2003). Caste fate conflict in swarm-founding  
739 social Hymenoptera: an inclusive fitness analysis. *J. Evol. Biol.*, **16**, 647–658.
- 740 Wenseleers, T., Hart, A. G., and Ratnieks, F. L. W. (2004a). When resistance is useless:  
741 policing and the evolution of reproductive acquiescence in insect societies. *Am. Nat.*,  
742 **164**, E154–E167.
- 743 Wenseleers, T., Helanterä, H., Hart, A., and Ratnieks, F. L. W. (2004b). Worker reproduction  
744 and policing in insect societies: an ESS analysis. *J. Evol. Biol.*, **17**, 1035–1047.
- 745 West Eberhard, M. J. (1975). The evolution of social behavior by kin selection. *Quart. Rev.*  
746 *Biol.*, **50**, 1–33.
- 747 Wilson, E. O. (1971). *The Insect Societies*. Harvard Univ. Press, Cambridge, MA.
- 748 Wolf, J. B. and Wade, M. J. (2009). What are maternal effects (and what are they not)? *Phil.*  
749 *Trans. R. Soc. B*, **364**, 1107–1115.
- 750 Worden, L. and Levin, S. A. (2007). Evolutionary escape from the prisoner's dilemma. *J.*  
751 *Theor. Biol.*, **245**, 411–422.
- 752 Yanega, D. (1988). Social plasticity and early-diapausing females in a primitively social bee.  
753 *Proc. Nat. Acad. Sci. USA*, **85**, 4374–4377.

Table 1: Notation for the traits.

| In a focal individual | Population average | Definition                                                                                                                               |
|-----------------------|--------------------|------------------------------------------------------------------------------------------------------------------------------------------|
| $p_m$                 | $p$                | Probability that a mother influences first-brood subjects                                                                                |
| $q_1$                 | $q$                | Probability that an influenced subject resists the influence                                                                             |
| $a_m$                 | $a$                | Fraction of maternal resource allocated to first-brood subjects                                                                          |
| $e_{m1}$              | $e_1$              | Fraction of the allocated resource to first-brood subjects that the mother spends producing them (she spends the rest provisioning them) |
| $e_{m2}$              | $e_2$              | Fraction of the allocated resource to second-brood offspring that the mother spends producing them                                       |
| $x_1$                 | $x$                | Probability that a first-brood subject stays spontaneously                                                                               |

Table 2: Additional notation. Offspring condition is  $k = p, n$  if maternally provisioned or maternally neglected.

|                                 |                                                                                              |
|---------------------------------|----------------------------------------------------------------------------------------------|
| $b_k$                           | Survival benefit received by a helped offspring in condition $k$                             |
| $b$                             | Average benefit received by helped offspring                                                 |
| $d$                             | Extent to which $b_p$ and $b_n$ are similar                                                  |
| $c_k$                           | Survival cost paid for helping a sibling in condition $k$                                    |
| $c$                             | Average cost for helping siblings                                                            |
| $E$                             | Total environmental resource                                                                 |
| $R$                             | Resource per mother                                                                          |
| $\gamma_\pi, \gamma_p$          | Energetic cost of producing and provisioning an average offspring                            |
| $n_i$                           | Number of class- $i$ offspring produced                                                      |
| $f_i$                           | Number of class- $i$ offspring produced weighted by maternal genetic contribution            |
| $n_{pi}$                        | Number of class- $i$ offspring that are maternally provisioned                               |
| $\zeta_i$                       | Fraction of class- $i$ offspring that are maternally provisioned                             |
| $s_0$                           | Baseline probability that an offspring becomes a parent                                      |
| $s_{\max}$                      | Maximum probability that a helped offspring becomes a parent                                 |
| $s_m$                           | Probability that a young mother survives to become an old mother                             |
| $s_1, s_2$                      | Probability that a 1st-brood subject or 2nd-brood offspring becomes a mother                 |
| $s_{2k}$                        | Probability that a helped 2nd-brood offspring in condition $k$ becomes a parent              |
| $\eta_i$                        | Average genetic contribution of a mother to class- $i$ offspring                             |
| $\theta_\varphi, \theta_\sigma$ | Genetic contribution of a mother to female or male offspring                                 |
| $\sigma_i$                      | Proportion of female offspring produced in class- $i$ offspring                              |
| $N_i$                           | Number of class- $i$ individuals in the population                                           |
| $u_i$                           | Ecological equilibrium frequency of class- $i$ individuals in the population                 |
| $v_i$                           | Reproductive value of class- $i$ individuals                                                 |
| $\rho_{ji}$                     | Regression relatedness of an average class- $i$ actor toward an average class- $j$ recipient |
| $r_{ji}$                        | Weighted regression relatedness, $\eta_j \sigma_j \rho_{ji}$                                 |
| $V_z$                           | Additive genetic variance of trait $z$                                                       |
| $g_z$                           | Breeding value (additive genetic component) of trait $z$ in the actor                        |

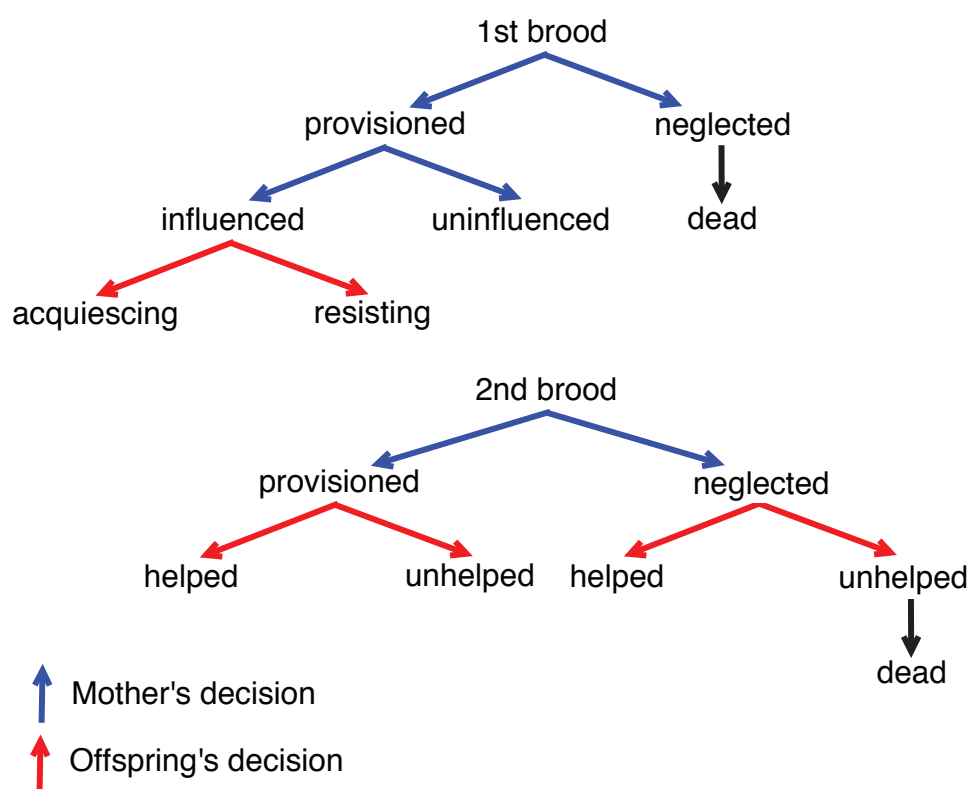

Figure 1: Tree description of the model. See text for details.

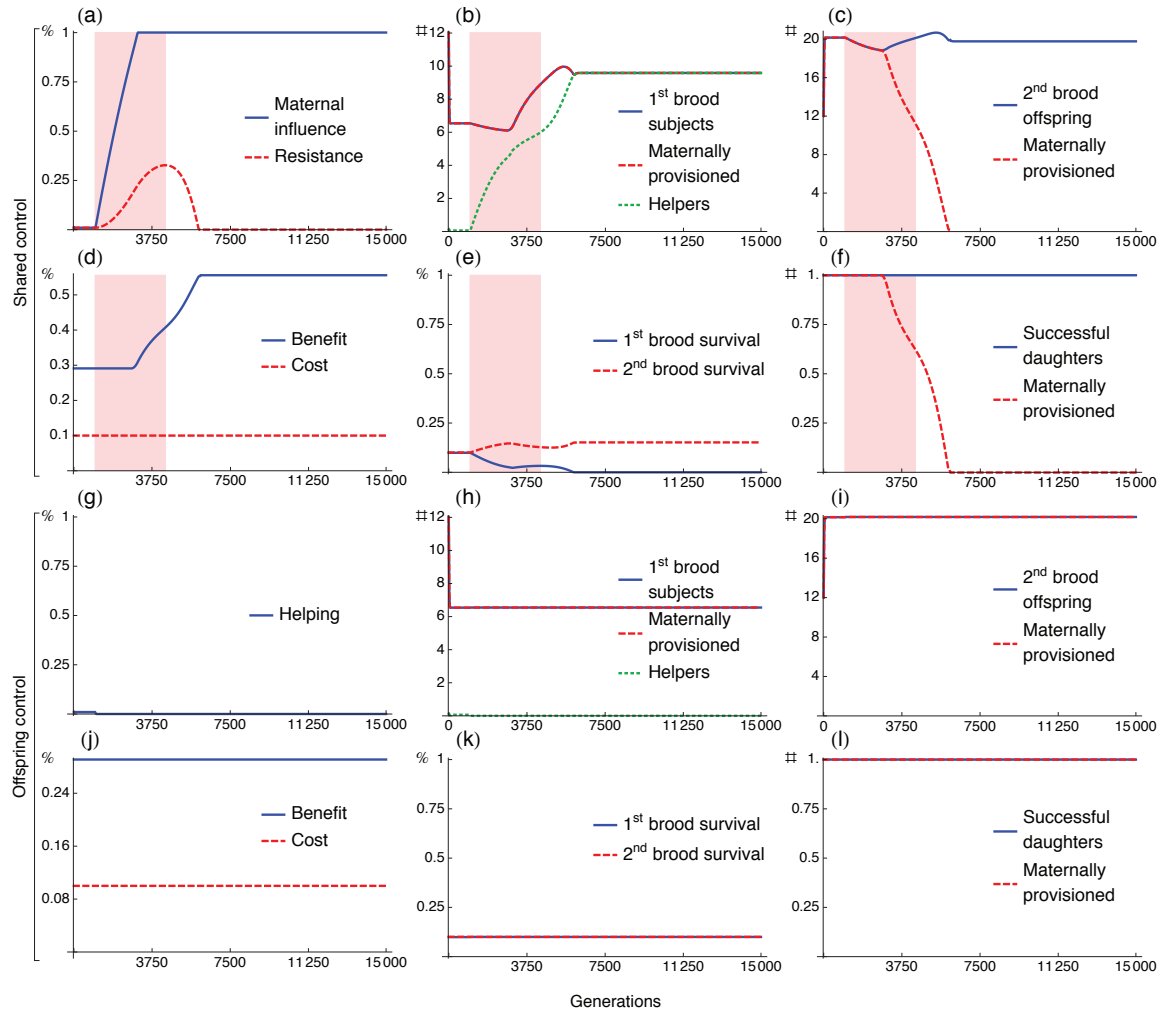

Figure 2: Stable eusociality via maternal manipulation with costless resistance. The plots show population-average values vs. generations. In the two top rows, offspring can be influenced by their mother to stay to help (shared control) (a-f). In the two bottom rows, offspring can stay without being influenced (offspring control) (g-l). In red shades, resistance to the maternal influence is favored to evolve (mother-offspring conflict). Because (a) resistance is initially ineffective, (b) the mother initially has some helpers that (c) allow her to reduce maternal care to the second brood, thereby (d) increasing the benefit that second-brood offspring receive from being helped which (a) eliminates selection for resistance. The genetic system is haplodiploid. Parameter values are in the Supporting Information 1 (SI1).

$d = 1$

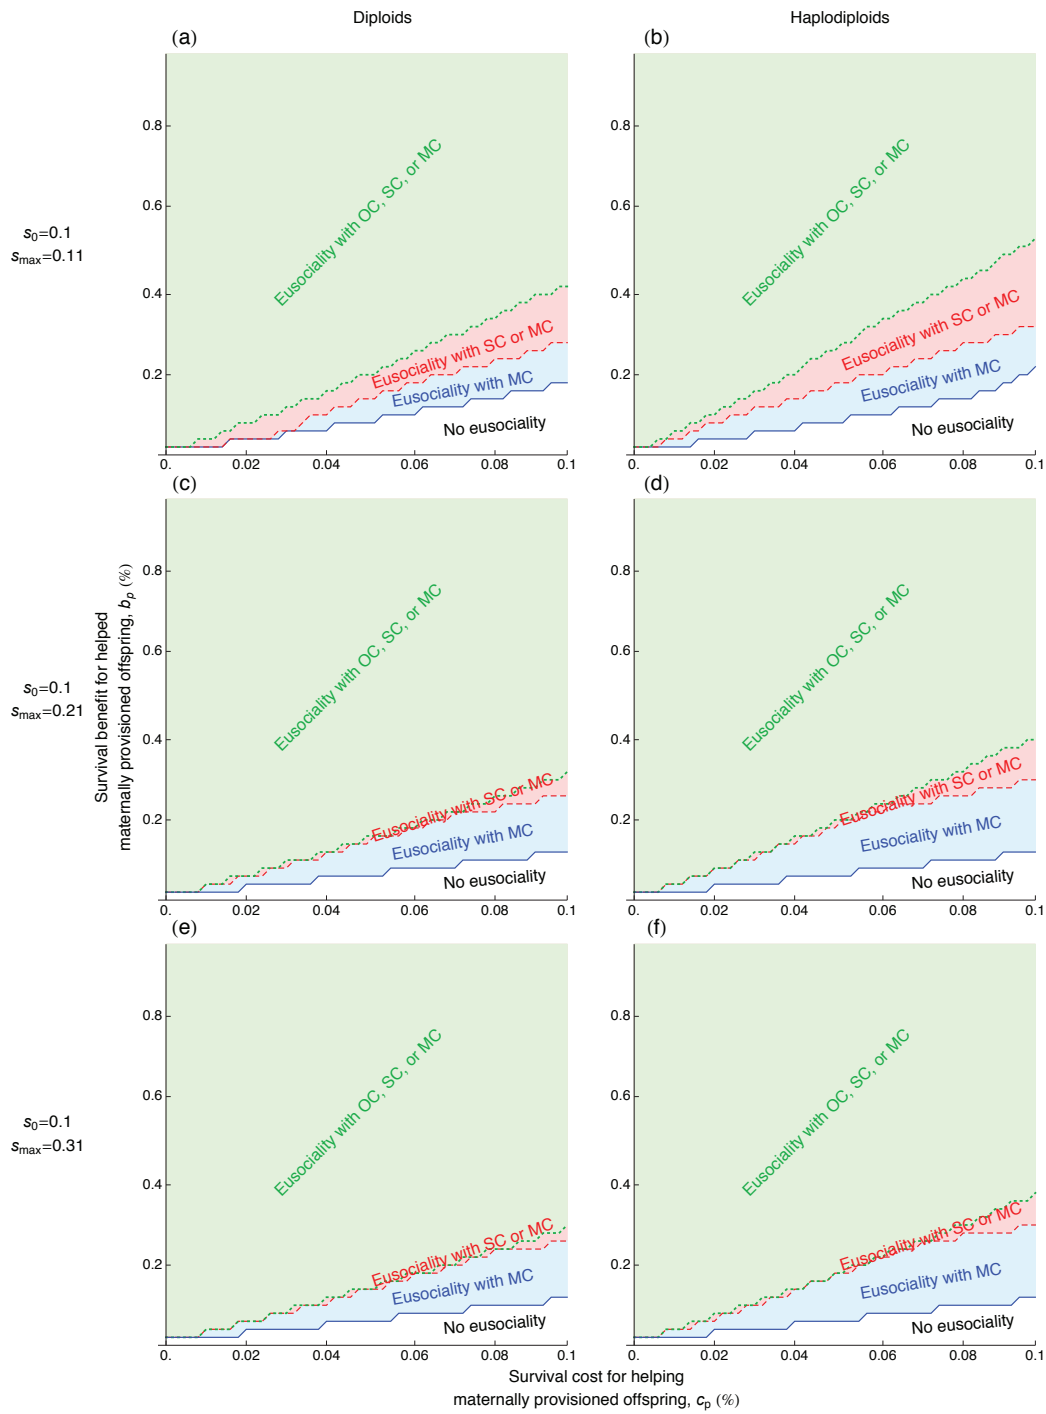

754

Figure 3: Stable eusociality via maternal manipulation can be obtained under smaller benefit-cost ratios than via offspring control despite costless resistance. The graphs show the outcome across values of the survival benefit for helped maternally provisioned offspring ( $b_p$ ) vs. the survival cost for helping maternally provisioned offspring ( $c_p$ ). In blue shade, eusociality is obtained with maternal control of offspring helping behavior (MC). In red shade, eusociality is obtained with either shared control (SC) or maternal control (MC). In green shade, eusociality is obtained with either offspring control (OC), shared control (SC), or maternal control (MC). When the cost for helping maternally provisioned siblings is maximal (here  $c_p = s_0 = 0.1$ ), the initial workers are sterile. An evolutionary outcome is here considered eusociality if at the end of the process the two broods are present ( $n_i \geq 1$ ) and if there is at least one sterile helper in the first brood [ $n_{p1}p(1-q) \geq 1$ ; sterility occurs because in all panels  $c_n = s_0 = 0.1$ ]. For the left column, the genetic system is diploid (a,c,e). For the right column, the genetic system is haplodiploid (b,d,f). In all panels,  $s_0 = 0.1$ . For the top row,  $s_{\max} = 0.11$  (a,b), the middle row  $s_{\max} = 0.21$  (c,d) and the bottom row  $s_{\max} = 0.31$  (e,f). Finally,  $b_n = b_p d s_{\max} / (d s_{\max} - s_0)$  and  $d = 1$ . The remaining parameter values are in the SI1.



## 755 Appendix

### 756 Life history implementation

757 I separate time into ecological and evolutionary scales. Individuals reproduce in an  
 758 ecological time scale, and traits change in an evolutionary time scale. I assume that the  
 759 ecological time scale is much faster than the evolutionary one. Ecological time is discrete,  
 760 while evolutionary time is continuous. At each ecological time, I monitor the defined four  
 761 classes of individuals: young mothers, old mothers, first-brood subjects, and second-brood  
 762 offspring (indexed by  $i = m, M, 1, 2$ ). A mother produces  $n_i$  offspring of class  $i$  ( $= 1, 2$ ). A  
 763 fraction  $\sigma_i$  of  $n_i$  is female. The average genetic contribution of the mother to class- $i$   
 764 offspring is  $\eta_i [= \sigma_i\theta_{\text{♀}} + (1 - \sigma_i)\theta_{\text{♂}}$ , where  $\theta_l$  is the genetic contribution of a mother to  
 765 sex- $l$  offspring; for diploids,  $\theta_l = 1/2$ , and for haplodiploids,  $\theta_{\text{♀}} = 1/2$  while  $\theta_{\text{♂}} = 1$ ].  
 766 Maternal fertility through class- $i$  offspring is  $f_i = \eta_i n_i$  (Taylor, 1990). Survival of class- $i$   
 767 offspring ( $i = 1, 2$ ), defined as the probability that a class- $i$  offspring becomes a young  
 768 mother, is  $s_i$ . The probability that a young mother becomes an old mother is  $s_m$ . The  
 769 number of class- $i$  individuals in the population at ecological time  $\tau$  is  $N_i(\tau)$ . With  
 770  $\mathbf{N} = (N_m, N_M, N_1, N_2)^T$ , then  $\mathbf{N}(\tau + 1) = \mathbf{WN}(\tau)$  where

$$\mathbf{W} = \begin{pmatrix} 0 & 0 & s_1 & s_2 \\ s_m & 0 & 0 & 0 \\ f_1 & 0 & 0 & 0 \\ 0 & f_2 & 0 & 0 \end{pmatrix}. \quad (\text{A1})$$

### 771 Survival

772 I assume that maternal survival  $s_m$  only depends on a constant environmental mortality,  
 773 and so  $s_m$  is independent of the evolving traits. The probability that a maternally

774 provisioned offspring becomes a parent in the absence of maternal influence or help is  $s_0$   
 775 (baseline survival). Since survival  $s_i$  ( $i = 1, 2$ ) is the probability of becoming a young  
 776 mother, the survival of a first-brood subject (who is a female with probability  $\sigma_1$ ) is

$$s_1 = \sigma_1 \{ \zeta_1 [ p_m(1 - q_1)(s_0 - c) + p_m q_1 s_0 + (1 - p_m) s_0 ] + (1 - \zeta_1) \times 0 \} \quad (\text{A2a})$$

$$= \sigma_1 \zeta_1 [ s_0 - c p_m(1 - q_1) ]. \quad (\text{A2b})$$

777 The probability that a second-brood offspring in condition  $k$  ( $k = p, n$ ) becomes a  
 778 parent after being helped is  $s_{2k}$ . The average resistance probability among the first-brood  
 779 subjects of a mother is  $Q$ . So,  $p_m(1 - Q)$  is the probability that first-brood subjects are  
 780 helpers. Then, the survival of a second-brood offspring is

$$s_2 = \sigma_2 \{ \zeta_2 [ p_m(1 - Q) s_{2p} + p_m Q s_0 + (1 - p_m) s_0 ] \quad (\text{A3a})$$

$$+ (1 - \zeta_2) [ p_m(1 - Q) s_{2n} + p_m Q \times 0 + (1 - p_m) \times 0 ] \} \quad (\text{A3b})$$

$$= \sigma_2 \{ s_0 \zeta_2 + p_m(1 - Q) [ \zeta_2 (s_{2p} - s_0) + (1 - \zeta_2) s_{2n} ] \}. \quad (\text{A3c})$$

781 To fully specify the survival of second-brood offspring ( $s_2$ ), it remains to specify the survival  
 782 of helped second-brood offspring in condition  $k$  ( $s_{2k}$ ).

783 Let  $s_{\max}$  be the maximum probability of becoming a parent after receiving help  
 784 (maximum survival). Following Charlesworth (1978), the survival of maternally provisioned  
 785 offspring after being helped is

$$s_{2p} = \begin{cases} s_0 + b_p \frac{n_{p1}}{n_2} & \text{if } \frac{n_{p1}}{n_2} \leq \frac{s_{\max} - s_0}{b_p} \\ s_{\max} & \text{otherwise.} \end{cases} \quad (\text{A4a})$$

786 The factor  $n_{p1}/n_2$  is the number of possible helpers over the number of recipients but since  
 787  $s_{2p}$  is already conditioned on the fact that the second-brood individual is helped, then  $n_{p1}$   
 788 in eq. (A4) gives the number of actual helpers. Survival  $s_{2p}$  saturates to  $s_{\max}$  if the ratio of

789 helpers to recipients  $n_{p1}/n_2$  is sufficiently large. The survival of maternally neglected  
 790 offspring after being helped is

$$s_{2n} = \begin{cases} 0 + b_n \frac{n_{p1}}{n_2} & \text{if } \frac{n_{p1}}{n_2} \leq \frac{s_{\max}}{b_n} \\ s_{\max} & \text{otherwise.} \end{cases} \quad (\text{A4b})$$

791 When the ratio of helpers to recipients is sufficiently small

792 [ $n_{p1}/n_2 \leq (s_{\max} - s_0)/b_p, s_{\max}/b_n$ ], then the survival of a second-brood offspring reduces to

$$s_2 = \sigma_2 \left[ s_0 \zeta_2 + b \frac{n_{p1} p_m (1 - Q)}{n_2} \right]. \quad (\text{A5})$$

### 793 **Survival approximation**

794 Survivals after being helped ( $s_{2k}$ ) are not differentiable at their switching points when

795  $n_{p1}/n_2$  becomes too large. The method of Taylor and Frank (1996) requires differentiation,

796 so I approximate  $s_{2k}$  by always differentiable functions as follows. Denoting  $\xi = n_{p1}/n_2$ ,  $s_{2p}$

797 can be written as a function  $s_{2p}(\xi)$  which can be approximated from below by a function of

798 the form

$$F(\xi) = A_1 [A_2 - \exp(-A_3 \xi)], \quad (\text{A6})$$

799 for some  $A_1, A_2, A_3$ . Setting  $F(0) = s_0$  and  $F(\infty) = s_{\max}$  yields  $A_1 = s_{\max} - s_0$  and

800  $A_2 = s_{\max}/A_1$ . Choosing  $F'(0) = b_p$  produces  $A_3 = b_p/A_1$ . Proceeding similarly with  $s_{2n}$

801 yields the approximations

$$s_{2p} \approx s_{\max} - (s_{\max} - s_0) \exp \left[ -b_p / (s_{\max} - s_0) (n_{p1}/n_2) \right] \quad (\text{A7a})$$

$$s_{2n} \approx s_{\max} \left\{ 1 - \exp \left[ -b_n / s_{\max} (n_{p1}/n_2) \right] \right\}, \quad (\text{A7b})$$

802 which hold for any  $n_{p1}/n_2 > 0$  (see Supporting Fig. 2).

## 803 **Population regulation**

804 Young mothers compete globally for resources to produce and provision first-brood  
805 subjects and second-brood offspring. The environment has a constant amount  $E$  of  
806 resources in energy units that females use for these purposes. Environmental resource  $E$  is  
807 divided uniformly among young mothers, so each young mother has an amount of resource  
808  $R = E/N_m$ . I assume that the population reaches zero growth during ecological time, which  
809 occurs when the leading eigenvalue of  $\mathbf{W}$  is one; that is, when  $f_1 s_1 + s_m f_2 s_2 = 1$  evaluated at  
810 population average values, which is a version of the Euler-Lotka equation (Charlesworth,  
811 1994). Solving for  $N_m$  yields the ecologically stationary number of young mothers

$$N_m = \frac{E}{\gamma\pi} [\eta_1 a e_1 s_1 + \eta_2 (1 - a) e_2 s_2 s_m] \quad (\text{A8})$$

812 evaluated at population averages. Population size is  $N = N_m + N_M + N_1 + N_2$ , where from  
813  $\mathbf{N} = \mathbf{W}\mathbf{N}$  we have that  $N_M = s_m N_m$ ,  $N_1 = f_1 N_m$ , and  $N_2 = f_2 N_M$ . Notice that although  
814 population size remains constant in ecological time scales, it can evolve in evolutionary  
815 time scales as trait values change. From eqs. (1), it follows that the ecologically stationary  
816 number of offspring is  $n = 1 / [\eta_1 \alpha s_1 + \eta_2 (1 - \alpha) s_2 s_m]$ .

## 817 **Dynamic equations**

818 I study the coevolution of maternal influence, resistance, and maternal resource allocation  
819 (i.e.,  $p$ ,  $q$ ,  $a$ ,  $e_1$ , and  $e_2$ , which denote population averages). As previously stated, I assume  
820 they are additive, uncorrelated, quantitative genetic traits. The additive genetic variance of  
821 trait  $z$  is  $V_z$  ( $z = p, q, a, e_1, e_2$ ). From the previous section,  $R$  is a function of population  
822 average trait values and is then constant with respect to the actor's breeding value (i.e., the  
823 additive genetic component of the trait in the individual controlling the trait). The  
824 equilibrium frequency of class- $i$  individuals during the ecological time scale, or simply the

825 class- $i$  ecological equilibrium frequency, is  $u_i$ . The individual reproductive value of class- $i$   
 826 individuals is  $v_i$ .  $u_i$  and  $v_i$  are respectively the right and left eigenvectors of  $\mathbf{W}$  after  
 827 normalization so that  $\sum u_i = \sum u_i v_i = 1$  (Leslie, 1948, Taylor, 1990). I assume that mutation  
 828 and selection are weak. Thus, for evolutionary time  $t$ , the change in the population average  
 829 value of trait  $z$  can be approximated (Taylor and Frank, 1996, Frank, 1997) by

$$\frac{dz}{dt} = V_z \sum_{ij} v_i \frac{\partial w_{ij}}{\partial g_z} u_j \quad (\text{A9a})$$

$$= V_z \left( v_m \frac{\partial s_1}{\partial g_z} u_1 + v_m \frac{\partial s_2}{\partial g_z} u_2 + v_1 \frac{\partial f_1}{\partial g_z} u_m + v_2 \frac{\partial f_2}{\partial g_z} u_M \right) \quad (\text{A9b})$$

$$= \frac{1}{\Lambda} V_z \left( f_1 \frac{\partial s_1}{\partial g_z} + s_m f_2 \frac{\partial s_2}{\partial g_z} + s_1 \frac{\partial f_1}{\partial g_z} + s_m s_2 \frac{\partial f_2}{\partial g_z} \right), \quad (\text{A9c})$$

830 evaluated at population averages, where  $w_{ij}$  is the  $ij$ -th entry of  $\mathbf{W}$ ,  $g_z$  is the actor's  
 831 breeding value for  $z$ , and  $\Lambda = 2 + s_m f_2 s_2$  is a scaling factor due to population growth. The  
 832 values of  $u_i$  and  $v_i$  are found below in Demographic variables.

833 I solve system (A9) numerically making use of the approximations of  $s_{2k}$  in eqs. (A7) [see  
 834 Supporting Information 3 (SI3) for computer code]. However, the exact  $s_{2k}$  yield a system  
 835 that is conceptually useful. Specifically, for  $n_{p1}/n_2 \leq (s_{\max} - s_0)/b_p$ ,  $s_{\max}/b_n$ , using the exact  
 836  $s_{2k}$  yields

$$\frac{dp}{dt} = \frac{1}{\Lambda} V_p n_{p1} (1 - q) (br_{2m} s_m - cr_{1m}) \quad (\text{A10a})$$

$$\frac{dq}{dt} = -\frac{1}{\Lambda} V_q n_{p1} p (br_{21} s_m - cr_{11}) \quad (\text{A10b})$$

$$\frac{da}{dt} = \frac{1}{\Lambda} V_a \frac{R}{\gamma_p} \left\{ s_0 [(1 - e_1) r_{1m} - (1 - e_2) r_{2m} s_m] + p(1 - q)(1 - e_1) (br_{2m} s_m - cr_{1m}) \right\} \quad (\text{A10c})$$

$$\frac{de_1}{dt} = -\frac{1}{\Lambda} V_{e_1} a \frac{R}{\gamma_p} [s_0 r_{1m} + p(1 - q) (br_{2m} s_m - cr_{1m})] \quad (\text{A10d})$$

$$\frac{de_2}{dt} = -\frac{1}{\Lambda} V_{e_2} (1 - a) \frac{R}{\gamma_p} \left\{ s_0 r_{2m} s_m - p(1 - q) \frac{n_{p1}}{n_2} \frac{1}{e_2} [(b_n - b_p) r_{2m} s_m - (c_n - c_p) r_{1m}] \right\}. \quad (\text{A10e})$$

837 where  $r_{ji} = \eta_j \sigma_j \rho_{ji}$ ,  $\rho_{ji} = dz_j/dg_{z_i}$  is the regression relatedness of class- $i$  actor to class- $j$   
 838 recipient,  $z_j$  is the trait in the recipient, and  $g_{z_i}$  is the breeding value in the actor (see SI2

839 for check of the derivation).

## 840 **No helping**

841 By removing maternal influence (setting  $p = 0$  and  $V_p = 0$ ), system (A10) reduces to

$$\frac{da}{dt} = \frac{1}{\Lambda} V_a \frac{R}{\gamma_p} s_0 [(1 - e_1)r_{1m} - (1 - e_2)r_{2m}s_m] \quad (\text{A11a})$$

$$\frac{de_1}{dt} = -\frac{1}{\Lambda} V_{e_1} a \frac{R}{\gamma_p} s_0 r_{1m} \quad (\text{A11b})$$

$$\frac{de_2}{dt} = -\frac{1}{\Lambda} V_{e_2} (1 - a) \frac{R}{\gamma_p} s_0 r_{2m}s_m. \quad (\text{A11c})$$

842 This system evolves to minimal investment in offspring production [i.e.,

843  $e_1^* = e_2^* = \gamma_\pi / (\gamma_\pi + \gamma_p)$ ] and to either the loss of one brood or to a constant investment in

844 each brood [i.e.,  $a^* = 0, 1, a(0)$ ] depending on how related the mother is to the broods (i.e.,

845 depending on whether  $r_{1m} < r_{2m}s_m$ ,  $r_{1m} > r_{2m}s_m$ , or  $r_{1m} = r_{2m}s_m$ , respectively). I assume

846 that maternal survival is such that the mother is favored to produce two broods in the

847 absence of helping; so I let  $s_m = r_{1m}/r_{2m}$ . For diploids, this means that  $s_m = 1$  while for

848 haplodiploids  $s_m$  can be smaller than one. A survival  $s_m = 1$  can refer to the case in which

849 the mother produces and provisions the offspring of both broods at once (mass

850 provisioning), while second-brood offspring hatch from their eggs later. The assumption of

851  $s_m = r_{1m}/r_{2m}$  can be relaxed in more complex models incorporating selection pressures for

852 producing two broods.

## 853 **Offspring control**

854 I consider a modified model where first-brood subjects stay spontaneously (i.e., without

855 maternal influence) in the natal nest for some period of their adulthood. Subjects are here

856 understood as a subset of first-brood offspring in which the staying propensity is expressed

857 (e.g., females only or both sexes). A first-brood subject stays spontaneously with

858 probability  $x_1$ . The survival of a first-brood subject is now

$$s_1 = \sigma_1 \{ \zeta_1 [x_1(s_0 - c) + (1 - x_1)s_0] + (1 - \zeta_1) \times 0 \} \quad (\text{A12a})$$

$$= \sigma_1 \zeta_1 (s_0 - cx_1). \quad (\text{A12b})$$

859 The average probability of staying spontaneously among the first-brood subjects of a

860 mother is  $X$ . The survival of a second-brood offspring is now

$$s_2 = \sigma_2 \{ \zeta_2 [Xs_{2p} + (1 - X)s_0] \quad (\text{A13a})$$

$$+ (1 - \zeta_2) [Xs_{2n} + (1 - X) \times 0] \} \quad (\text{A13b})$$

$$= \sigma_2 \{ s_0 \zeta_2 + X [ \zeta_2 (s_{2p} - s_0) + (1 - \zeta_2) s_{2n} ] \}, \quad (\text{A13c})$$

861 with the exact and approximated  $s_{2k}$  defined as before.

862 I also solve system (A9) numerically for this model using the approximations of  $s_{2k}$  in

863 eqs. (A7). However, for a sufficiently small ratio of helpers to recipients

864  $[n_{p1}/n_2 \leq (s_{\max} - s_0)/b_p, s_{\max}/b_n]$ , using the exact  $s_{2k}$  and letting  $x$  denote the population

865 average staying probability, the dynamic equations are

$$\frac{dx}{dt} = \frac{1}{2} V_x n_{p1} (br_{21}s_m - cr_{11}) \quad (\text{A14a})$$

$$\frac{da}{dt} = \frac{1}{2} V_a \frac{R}{\gamma_p} \{ s_0 [(1 - e_1)r_{1m} - (1 - e_2)r_{2m}s_m] + x(1 - e_1)(br_{2m}s_m - cr_{1m}) \} \quad (\text{A14b})$$

$$\frac{de_1}{dt} = -\frac{1}{2} V_{e_1} a \frac{R}{\gamma_p} [s_0 r_{1m} + x(br_{2m}s_m - cr_{1m})] \quad (\text{A14c})$$

$$\frac{de_2}{dt} = -\frac{1}{2} V_{e_2} (1 - a) \frac{R}{\gamma_p} \left\{ s_0 r_{2m}s_m - x \frac{n_{p1}}{n_2} \frac{1}{e_2} [(b_n - b_p)r_{2m}s_m - (c_n - c_p)r_{1m}] \right\}. \quad (\text{A14d})$$

## 866 Demographic variables

867 The ecologically asymptotic population growth rate is  $\lambda$ , which is given by the only real

868 solution of the characteristic equation of  $\mathbf{W}$ ; that is, by  $\lambda^3 = \lambda f_1 s_1 + s_m f_2 s_2$ . Setting  $\lambda = 1$ ,

869 the ecological equilibrium frequencies of class- $i$  individuals are

$$u_m = \frac{1}{1 + f_1 + s_m(1 + f_2)} \quad (\text{A15a})$$

$$u_M = u_m s_m \quad (\text{A15b})$$

$$u_1 = u_m f_1 \quad (\text{A15c})$$

$$u_2 = u_m s_m f_2, \quad (\text{A15d})$$

870 and the reproductive values of class- $i$  individuals are

$$v_m = \frac{1}{u_m \Lambda} \quad (\text{A16a})$$

$$v_M = v_m f_2 s_2 \quad (\text{A16b})$$

$$v_1 = v_m s_1 \quad (\text{A16c})$$

$$v_2 = v_m s_2, \quad (\text{A16d})$$

871 all evaluated at population-average values.



## Contents

|          |                           |           |
|----------|---------------------------|-----------|
| <b>1</b> | <b>Parameter values</b>   | <b>2</b>  |
| <b>2</b> | <b>Supporting figures</b> | <b>4</b>  |
|          | <b>References</b>         | <b>18</b> |

# 1 Parameter values

To calculate regression relatednesses, I use the following expressions:

$$\rho_{im} = \sigma_i \rho_{dm} + (1 - \sigma_i) \rho_{sm} \quad (S1a)$$

$$\rho_{21} = \sigma_1 \sigma_2 \rho_{S\varphi} + \sigma_1 (1 - \sigma_2) \rho_{b\varphi} + (1 - \sigma_1) \sigma_2 \rho_{S\sigma} + (1 - \sigma_1) (1 - \sigma_2) \rho_{b\sigma}, \quad (S1b)$$

where the subscripts d, s, S, and b refer to daughter, son, sister, and brother respectively. Eqs. (S1) are in terms of standard regression relatedness values that can be obtained from pedigrees given the model assumptions (Hamilton, 1972).

I make the following assumptions. The mother is singly mated. For diploids, both broods have an even sex ratio. For haplodiploids, the second brood has an even sex ratio while the mother directs her influence only to first-brood females (so  $\sigma_1 = 1$ ). Survival of young mothers to old mothers is such that mothers are initially favored to produce two broods (so  $s_m = r_{1m}/r_{2m}$ ). However, this value was obtained for the exact survivals, so it is an approximation when using the approximated survival in eqs. (A7) in the main text. Therefore, I let maternal resource allocation evolve alone for 1000 generations to properly initialize the numerical solutions. I let all traits have the same genetic variance to avoid giving an evolutionary advantage to any of them. I let the cost of acquiescence when raising maternally neglected offspring equal the baseline survival ( $c_n = s_0$ ), which amounts to saying that helpers of maternally neglected offspring are sterile. I take the initial probability of maternal influence and resistance to be small. I let the initial maternal allocation to be such that the mother produces two equally large broods that she feeds entirely. For simplicity, I let the energetic cost of producing and feeding offspring be the equal. I take the environmental resource to be such that population size is in the tens of thousands.

Finally, I assume that maternally neglected offspring use help more efficiently than maternally provisioned offspring ( $b_n > b_p$ ). To reduce the parameter space, I consider two cases: strong and weak advantage in help use efficiency. Specifically, I take  $b_n$  to be as illustrated in Supporting Fig. 1. So, the benefit to maternally neglected offspring is  $b_n = b_p d s_{\max} / (d s_{\max} - s_0)$ , where  $d = 1, 2$  for strong and weak advantage in help use efficiency respectively.

The remaining parameters are  $s_0$ ,  $s_{\max}$ ,  $c_p$ , and  $b_p$ . From their definitions, they can take values while satisfying  $0 < s_0 < s_{\max} \leq 1$ ,  $c_p \leq s_0$ , and  $b_p > 0$ . With these assumptions, parameter values are those in Supporting Table 1 except when noted otherwise.

Supporting Table 1: For Fig. 3 and Supporting Figs. 9-14,  $t_{\text{final}} = 50\ 000$  while  $b_p \in [0, 1]$  and  $c_p \in [0, s_0]$ . To properly initialize the numerical solutions, genetic variances are  $\hat{V}_p = \hat{V}_q = \hat{V}_x = 0$ ,  $\hat{V}_{e_i} = V_{e_i} \times 1000$ , and  $\hat{V}_a = V_a \times 1000$  for  $t < 1000$ . \*The variance of  $e_i$  is scaled so that the additive effect of genes for traits  $e_i$  is equal to those for the other traits. †Values taken from Bulmer (1994) following Hamilton (1972).

| $E$                    | 100 000                                                                  | For diploids           |                                                           |                       |      |
|------------------------|--------------------------------------------------------------------------|------------------------|-----------------------------------------------------------|-----------------------|------|
| $V_p, V_q, V_a$        | 0.01                                                                     | $\sigma_1, \sigma_2$   | 0.5                                                       |                       |      |
| $V_{e_1}, V_{e_2}^*$   | $0.01 \left(1 - \frac{\gamma_\pi}{\gamma_\pi + \gamma_p}\right) = 0.005$ | $\eta_1, \eta_2$       | 0.5                                                       |                       |      |
| $\gamma_\pi, \gamma_p$ | 1                                                                        | $\rho_{1m}, \rho_{2m}$ | 0.5†                                                      |                       |      |
| $s_0$                  | 0.1                                                                      | $\rho_{21}$            | 0.5†                                                      |                       |      |
| $s_{\text{max}}$       | 0.21                                                                     | $s_m$                  | $\frac{r_{1m}}{r_{2m}} = 1$                               |                       |      |
| $c_p$                  | $s_0 = 0.1$                                                              | $b_p$                  | 0.253                                                     |                       |      |
| $c_n$                  | $s_0 = 0.1$                                                              | $b_n$                  | $b_p \frac{s_{\text{max}}}{s_{\text{max}} - s_0} = 0.483$ |                       |      |
| $p(0), q(0)$           | 0.01                                                                     | For haplodiploids      |                                                           |                       |      |
| $e_1(0), e_2(0)$       | $\frac{\gamma_\pi}{\gamma_\pi + \gamma_p} = 0.5$                         | $\sigma_1$             | 1                                                         | $\sigma_2$            | 0.5  |
| $a(0)$                 | 0.5                                                                      | $\eta_\varnothing$     | 0.5                                                       | $\eta_\sigma$         | 1    |
| $t_{\text{final}} =$   | 15 000                                                                   | $\eta_1$               | 0.5                                                       | $\eta_2$              | 0.75 |
|                        |                                                                          | $\rho_{dm}$            | 0.5†                                                      | $\rho_{sm}$           | 1†   |
|                        |                                                                          | $\rho_{S\varnothing}$  | 0.75†                                                     | $\rho_{b\varnothing}$ | 0.5† |
|                        |                                                                          | $\rho_{S\sigma}$       | 0.25†                                                     | $\rho_{b\sigma}$      | 0.5† |
|                        |                                                                          | $\rho_{1m}$            | 0.5                                                       | $\rho_{2m}$           | 0.75 |
|                        |                                                                          | $\rho_{21}$            | 0.625                                                     |                       |      |
|                        |                                                                          | $s_m$                  | $\frac{r_{1m}}{r_{2m}} \approx 0.8889$                    |                       |      |
|                        |                                                                          | $b_p$                  | 0.291                                                     |                       |      |
|                        |                                                                          | $b_n$                  | $b_p \frac{s_{\text{max}}}{s_{\text{max}} - s_0} = 0.555$ |                       |      |

## 2 Supporting figures

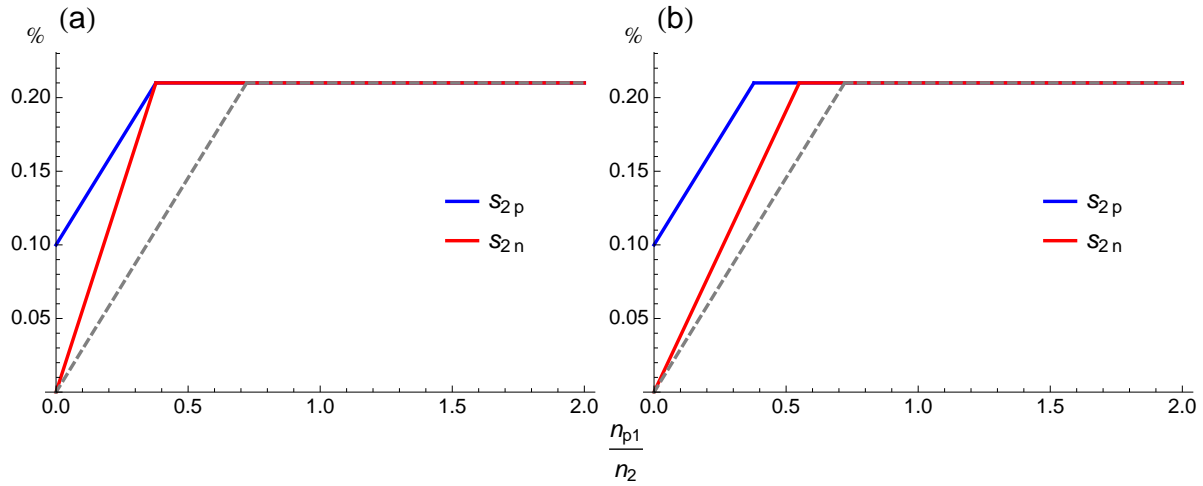

Supporting Figure 1: Survival of recipients of help. Plots are the survival of helped second-brood offspring that are maternally provisioned (blue lines) or maternally neglected (red lines) vs. the number of helpers over recipients. The slope of the red line is the survival benefit from being helped for maternally neglected offspring [which for small  $n_{p1}/n_2$  is  $b_n = b_p d s_{\max} / (d s_{\max} - s_0)$ ]. The advantage in help use efficiency by maternally neglected offspring is either (a) strong ( $d = 1$ ) or (b) weak ( $d = 2$ ). The dashed gray line is the survival of helped maternally neglected second-brood offspring when they have no advantage in help use efficiency ( $b_n = b_p$ ). Parameter values are those for haplodiploids in the Supporting Table. 1.

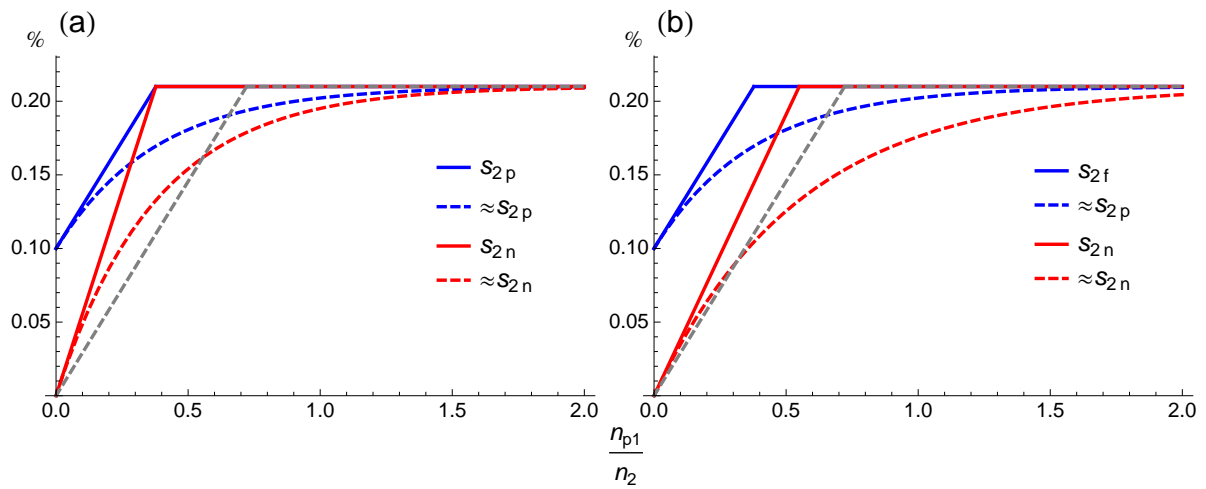

Supporting Figure 2: Approximations of recipients' survival. See legend of Supporting Fig. 1. Dashed lines are the approximated survival of helped second-brood offspring that are maternally provisioned (blue) or maternally neglected (red). Such approximations were used to obtain all numerical solutions.

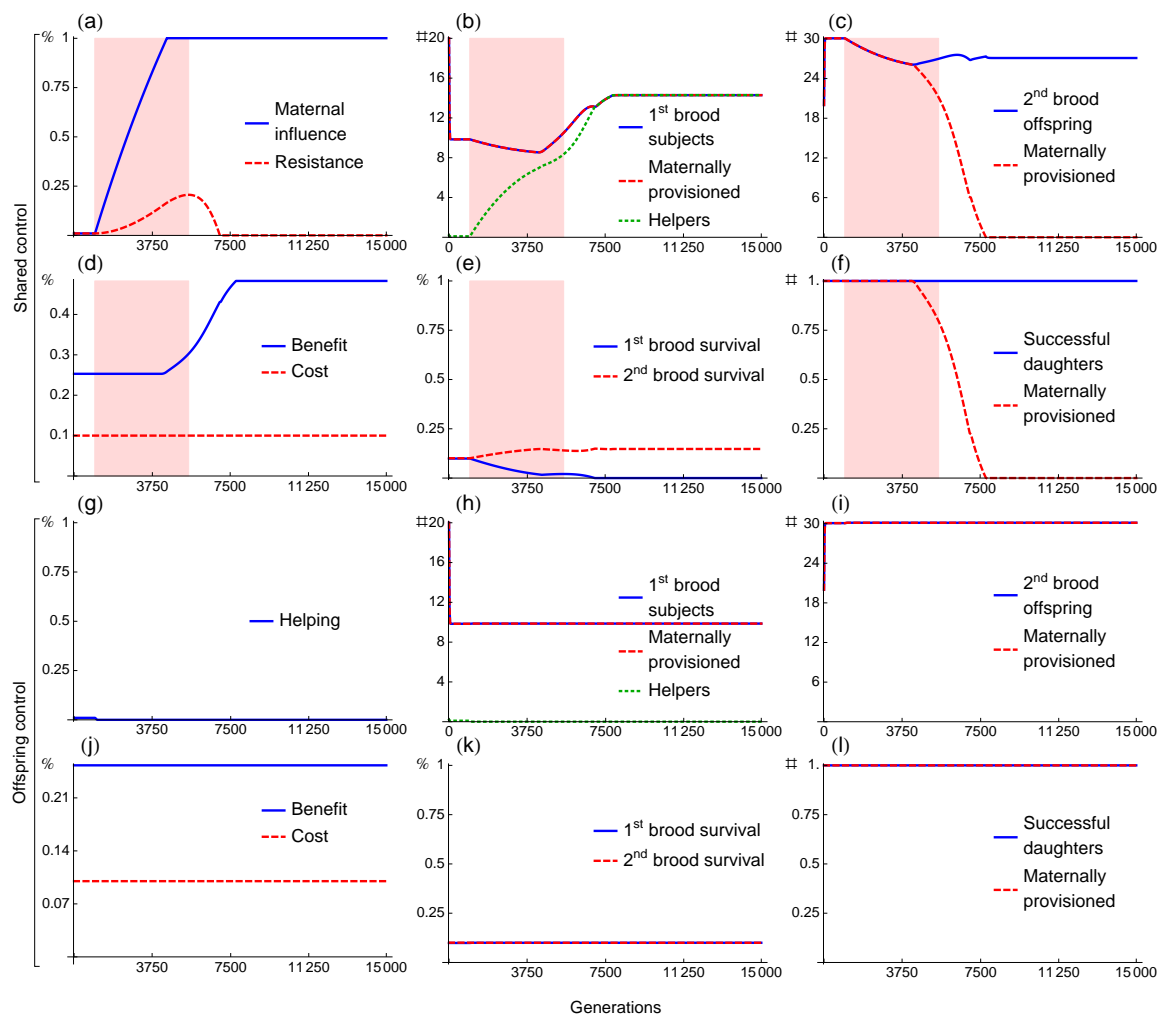

Supporting Figure 3: Stable eusociality via maternal manipulation with costless resistance in diploids. See legend of Fig. 2. Parameter values are in the Supporting Table 1.

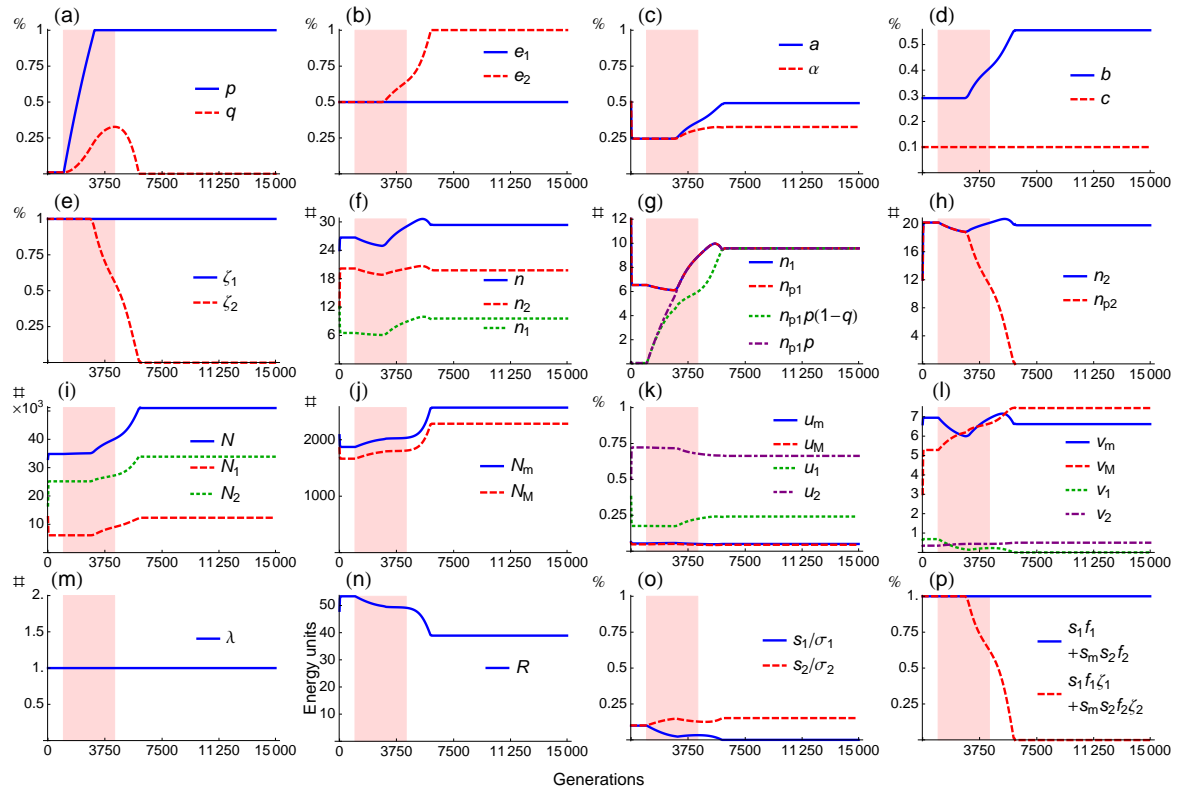

Supporting Figure 4: Detailed dynamics for haplodiploids under shared control. See legend of Fig. 2a-f. See Table 2 for definitions of variables. (b) The mother increases her investment in producing second-brood offspring. (h) The number of second-brood offspring remains largely constant. (i) Population size start to increase in evolutionary time when the mother increases here investment in second-brood offspring production. (m) Population size remains constant in ecological time since the ecologically asymptotic population growth rate remains 1. (n) Maternal resource decreases when the average offspring survival increases. (l) Reproductive values evolve and old mothers and second-brood offspring become more valuable. (g)  $n_{p1}p(1-q)$  is the number of helpers. (o)  $s_i/\sigma_i$  is the probability that a brood- $i$  offspring becomes a parent. (p)  $s_1f_1 + s_ms_2f_2$  is the number of daughters that become mothers weighted by maternal genetic contribution.  $s_1f_1\zeta_1 + s_ms_2f_2\zeta_2$  is the number of them that are maternally provisioned.

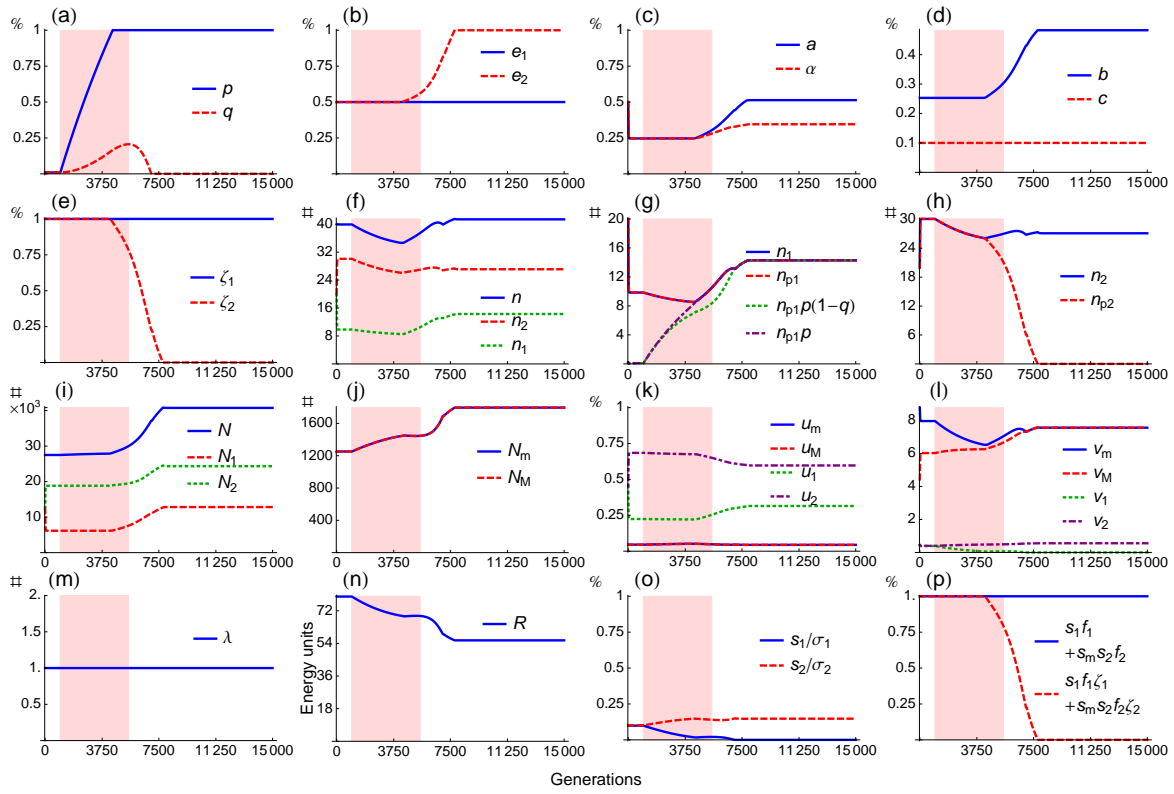

Supporting Figure 5: Detailed dynamics for diploids under shared control. See legend of Supporting Figs. 3a-f and 4.



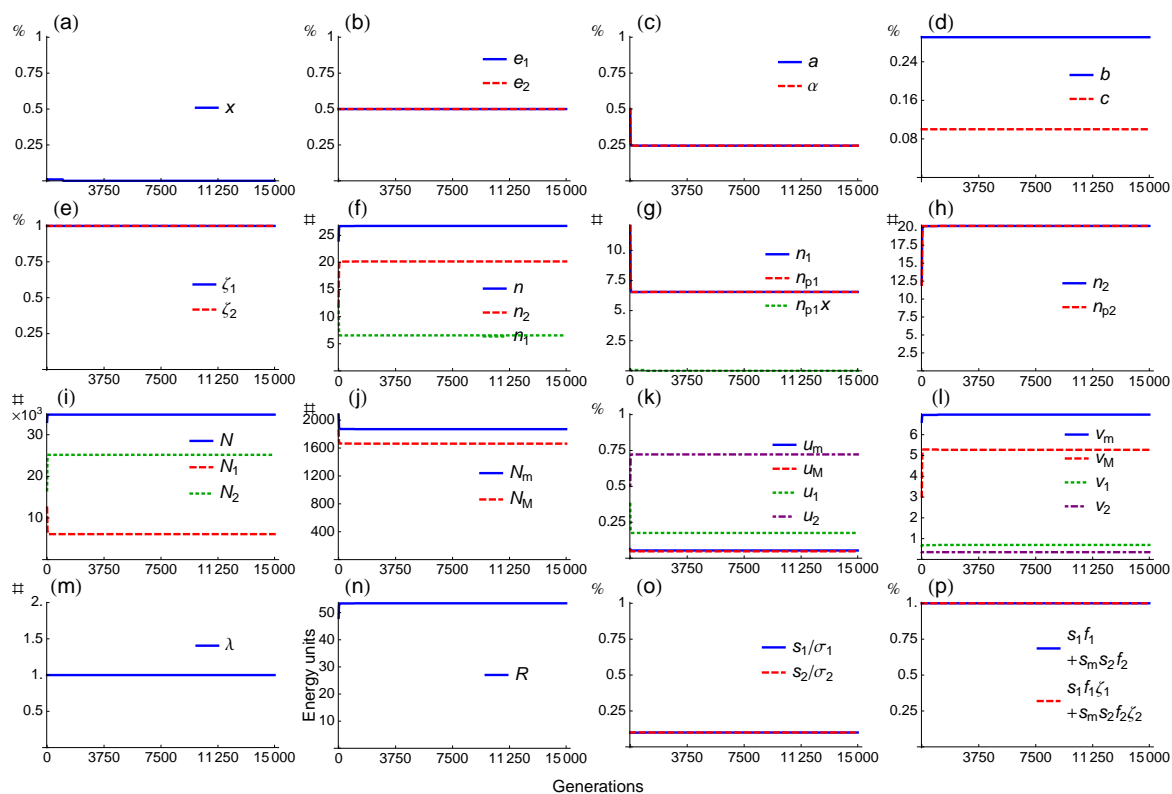

Supporting Figure 6: Detailed dynamics for haplodiploids under offspring control. See legend of Fig. 2g-l and Supporting Fig. 4. (a)  $x$  is the population-average probability that a first-brood subject stays in the natal nest in the absence of maternal influence.

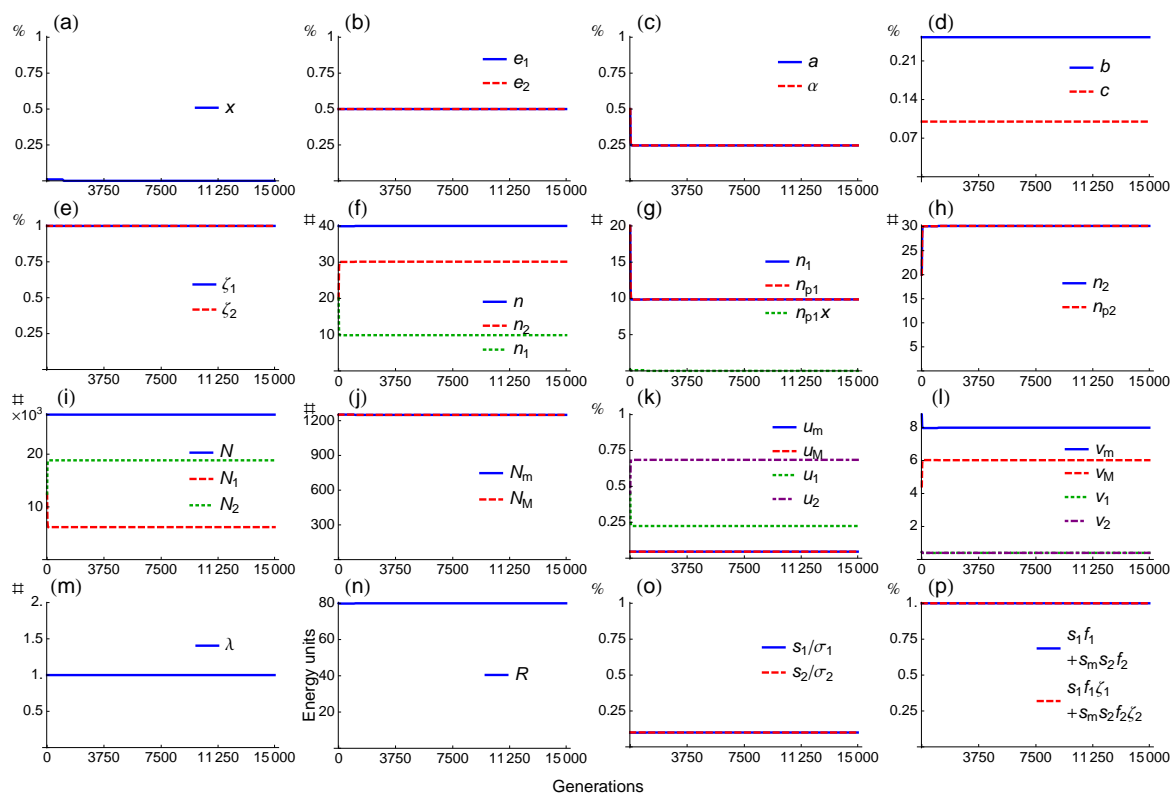

Supporting Figure 7: Detailed dynamics for diploids under offspring control. See legend of Supporting Figs. 3g-l and 6.

Supporting Figure 9-14: Parameter space exploration. See legend of Fig. 3 in the main text. Baseline survival is small ( $s_0 = 0.1$ ) in Supporting Figs. 9 and 10; intermediate ( $s_0 = 0.3$ ) in Supporting Figs. 11 and 12, and large ( $s_0 = 0.5$ ) in Supporting Figs. 13 and 14. The advantage of maternally neglected offspring in help use efficiency is strong ( $d = 1$ ) for Supporting Figs. 9, 11, and 13; and weak ( $d = 2$ ) for Supporting Figs. 10, 12, and 14. For certain regions, one of the broods is absent in the end ( $n_i < 1$ ) as the mother devotes most of her resources toward one of them (Supporting Figs. 10b, 11b, 12a,b, 13b, and 14a,b; bordering lines with no eusociality are not shown). The remaining parameter values are in Supporting Table 1.

$d = 1$

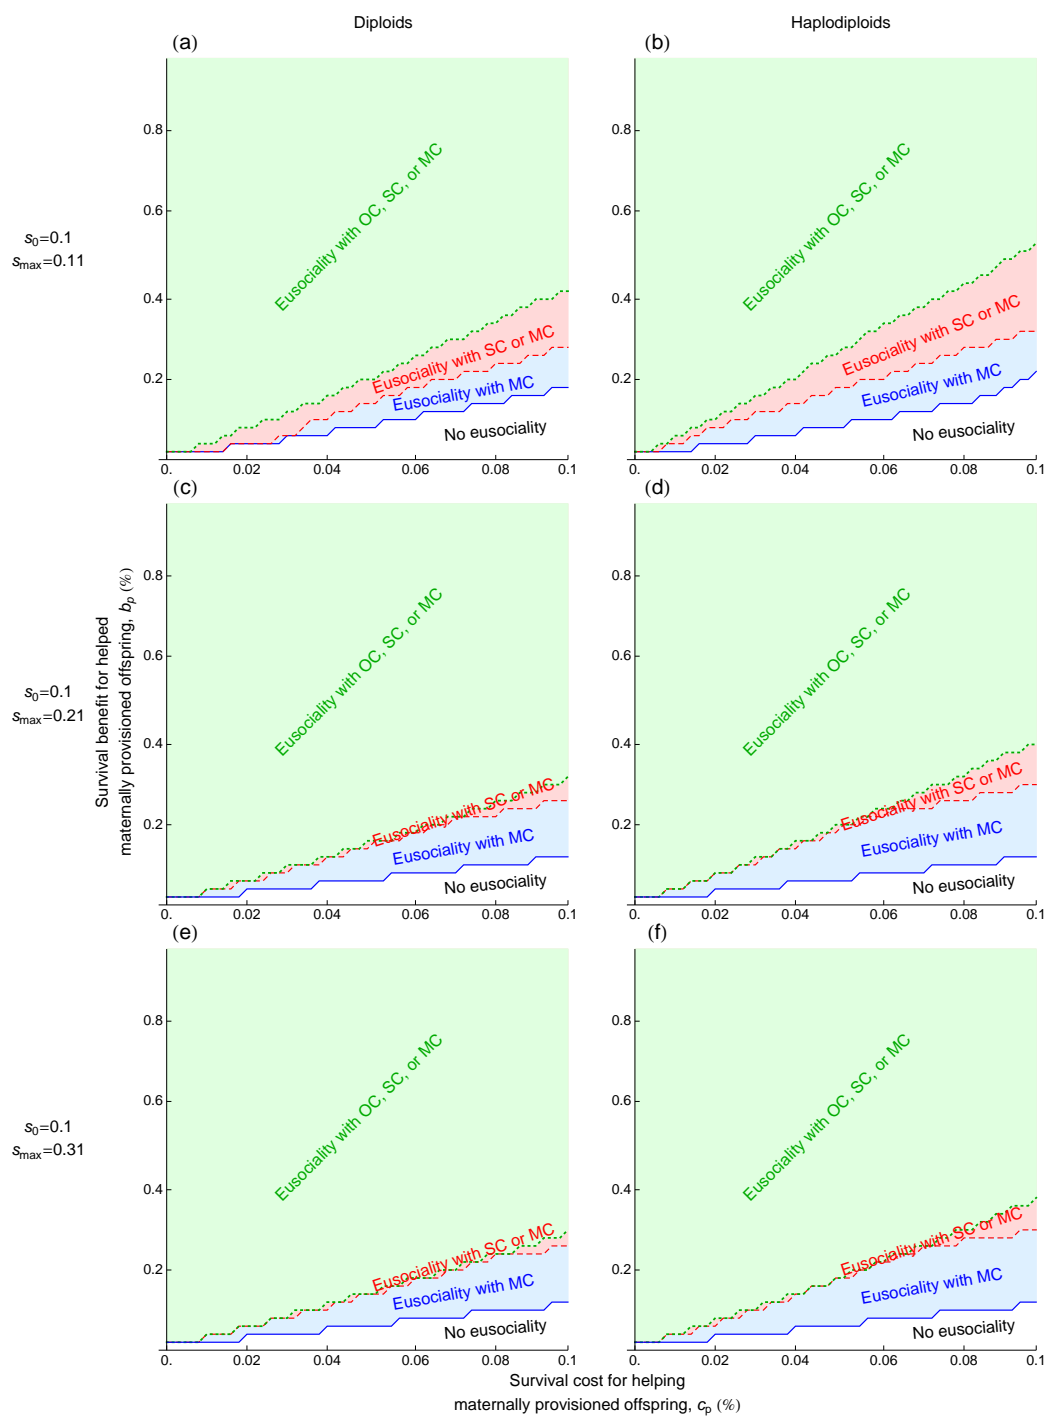

Supporting Figure 9

$d = 2$

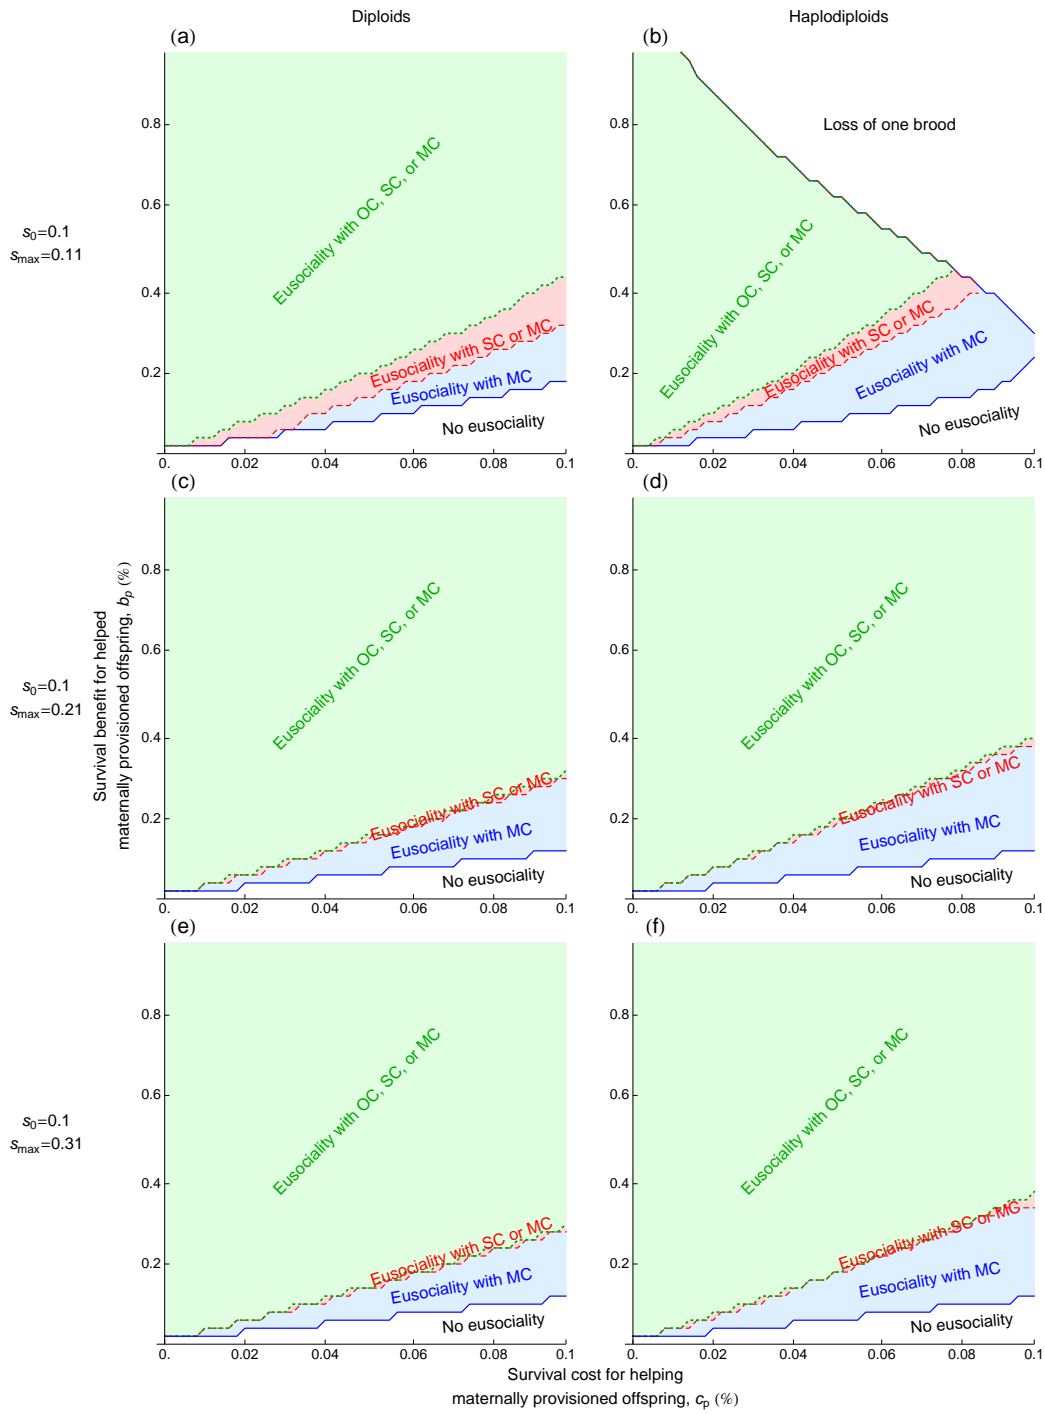

Supporting Figure 10

$d = 1$

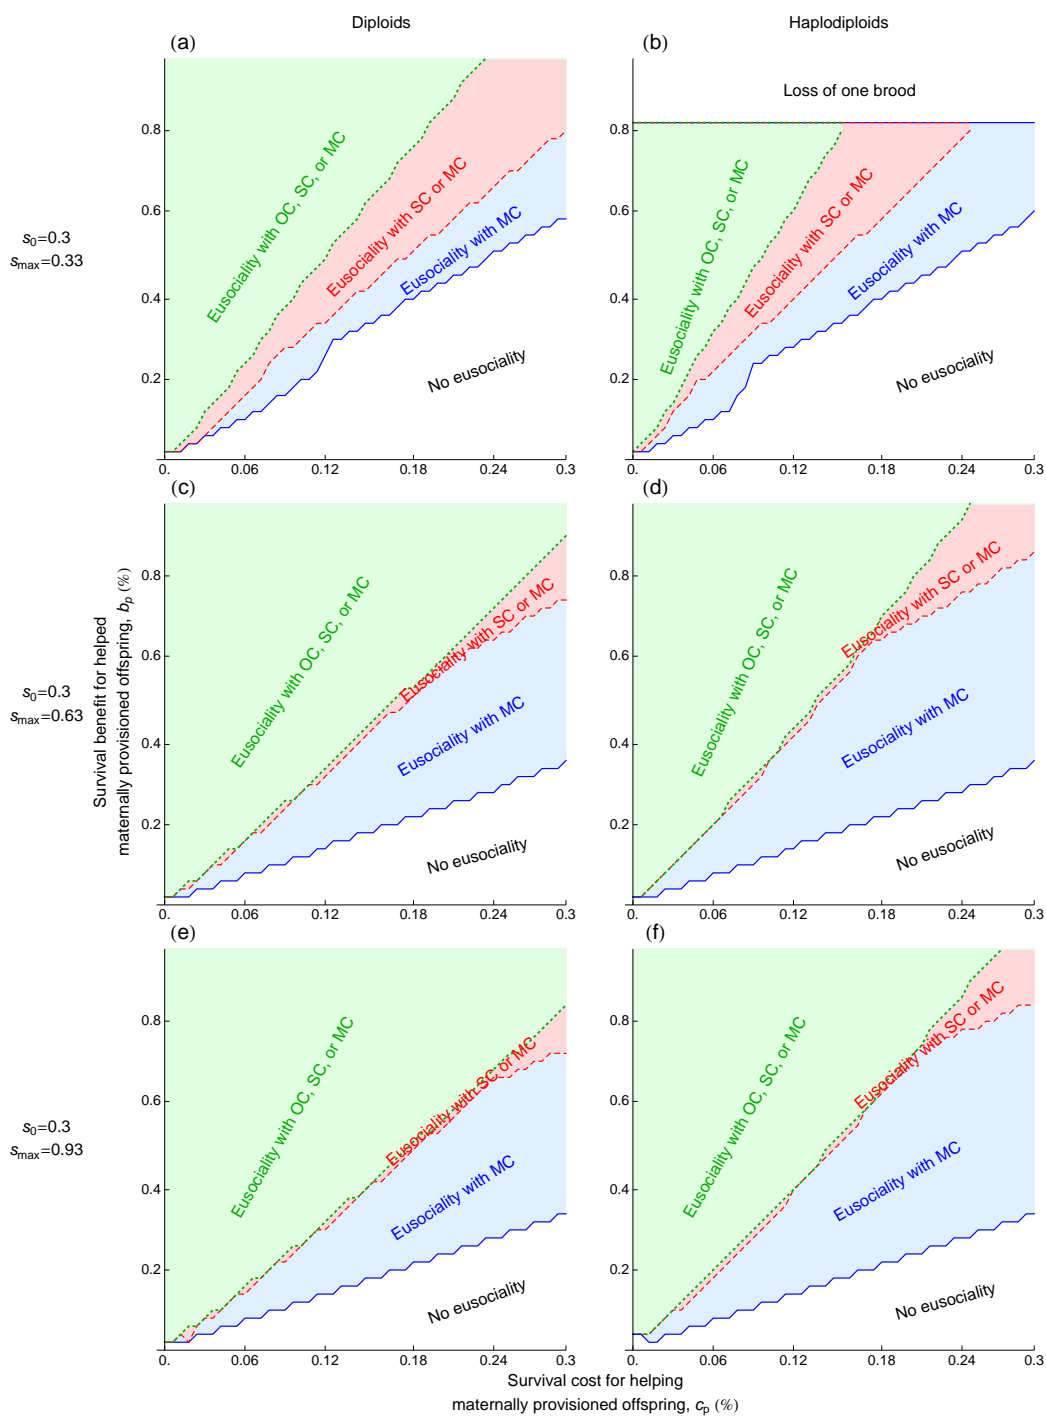

Supporting Figure 11

$d = 2$

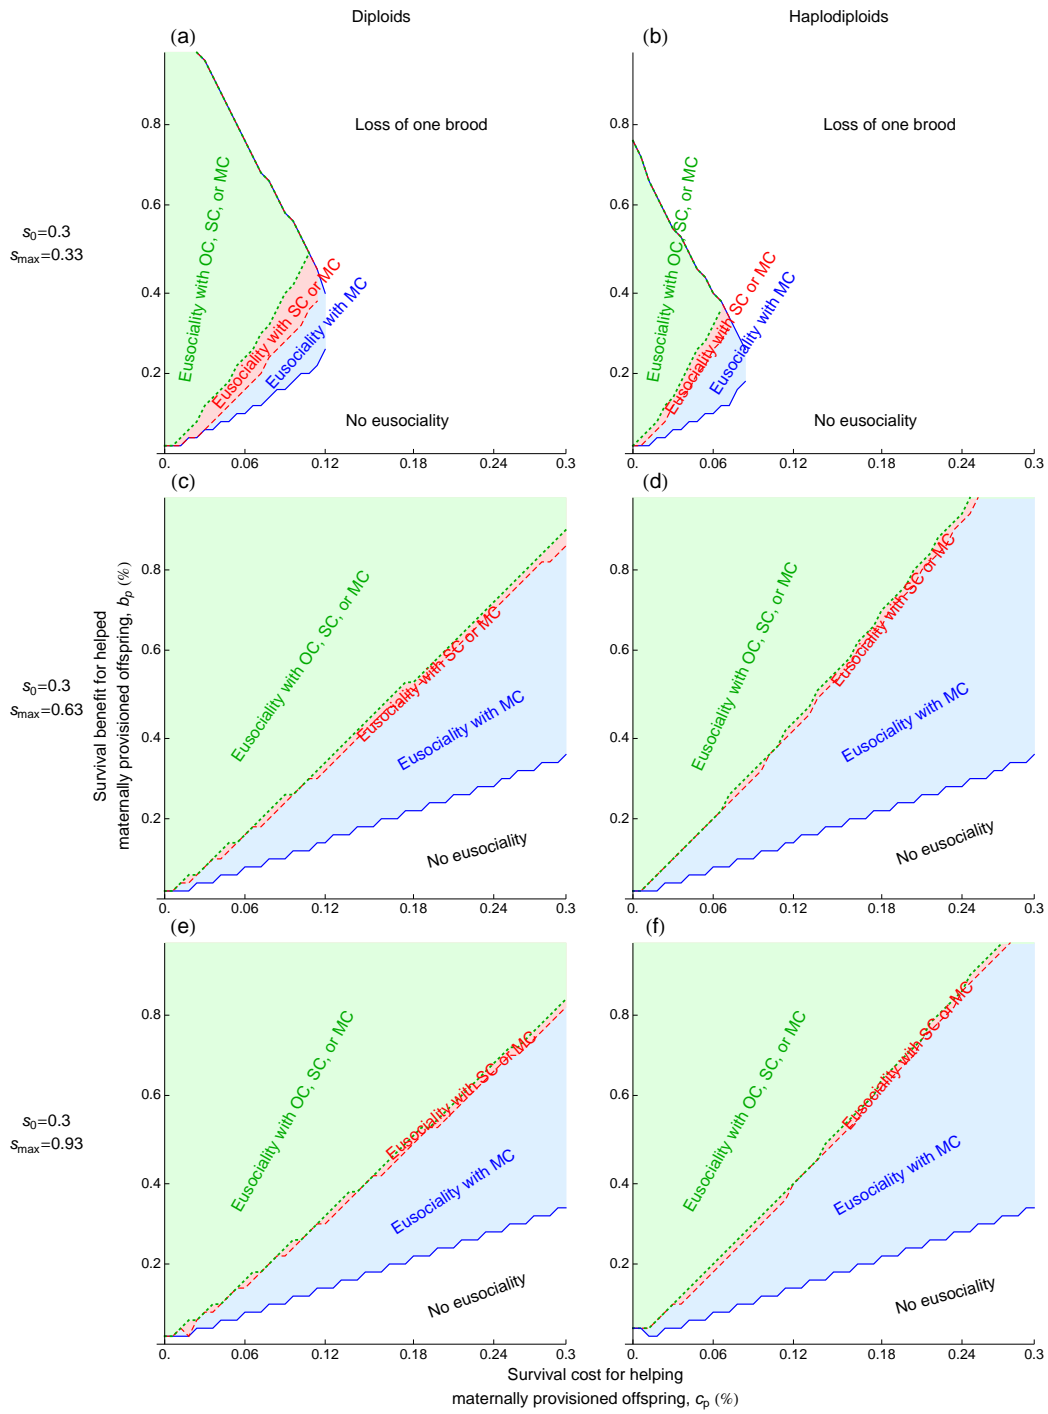

Supporting Figure 12

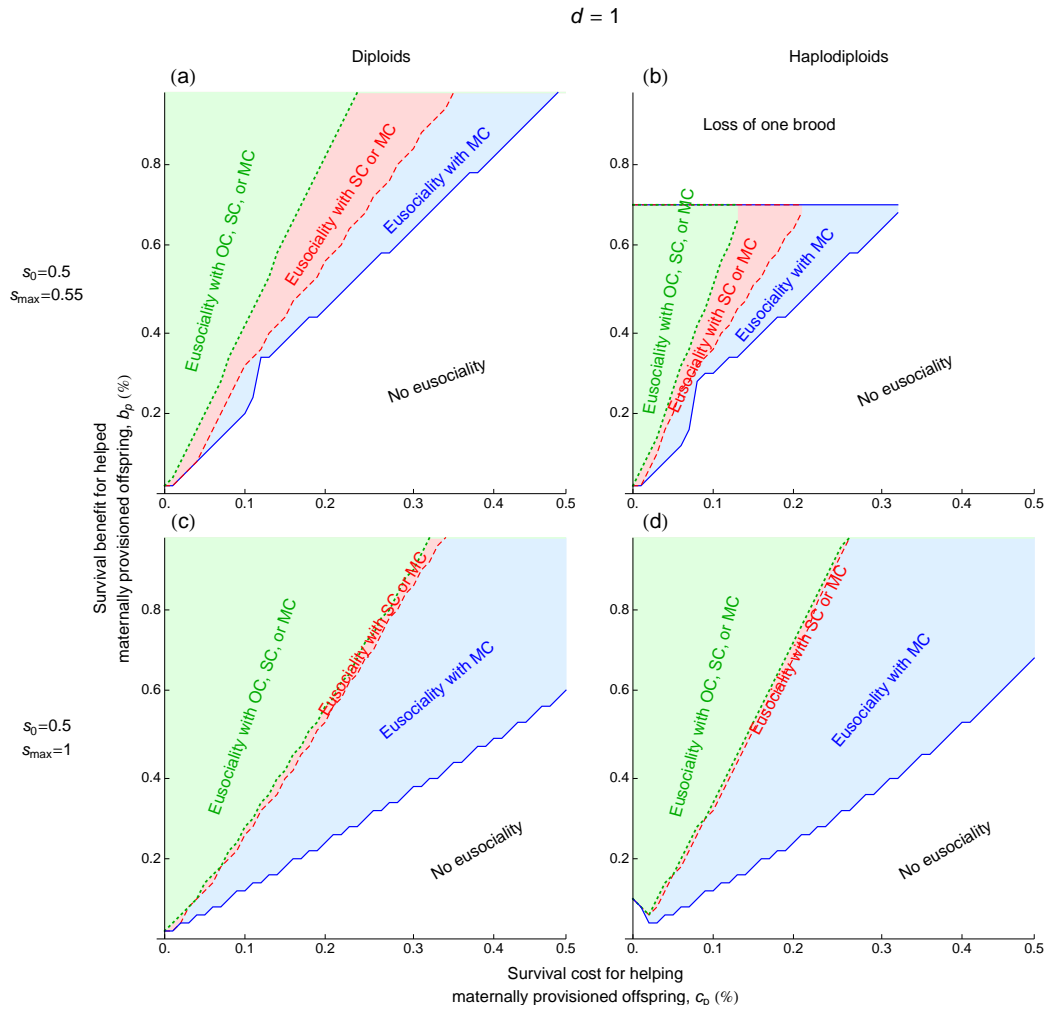

Supporting Figure 13



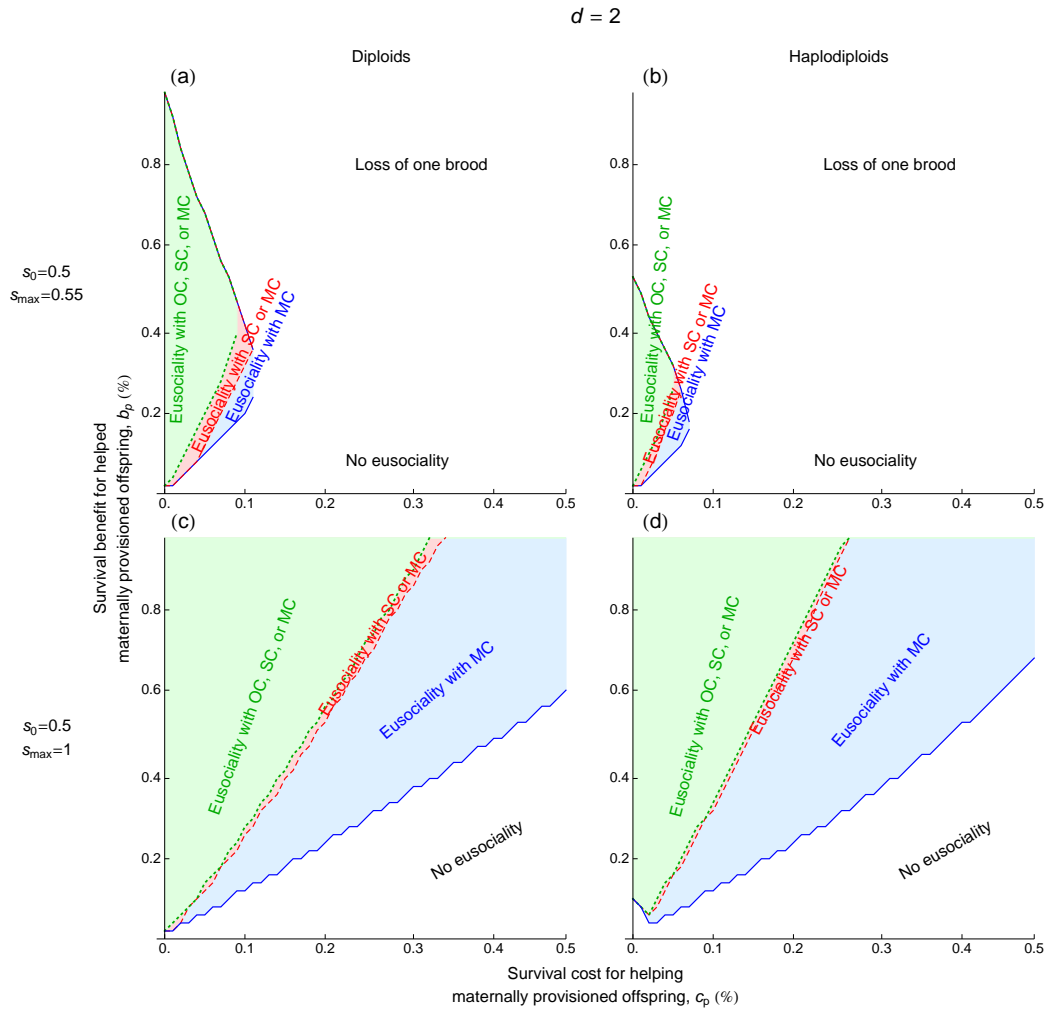

Supporting Figure 14

## References

Bulmer, M. (1994). *Theoretical Evolutionary Ecology*. Sinauer.

Hamilton, W. D. (1972). Altruism and related phenomena, mainly in social insects. *Annu. Rev. Ecol. Evol. Syst.*, **3**, 193–232.
